# Supplementary material for: Cancer cell redirection biomarker discovery using a mutual information approach
Source: PLoS One. 2017 Jun 8;12(6):e0179265. doi: 10.1371/journal.pone.0179265 (PMC5464651; doi:10.1371/journal.pone.0179265)
Supplement: S3 Table — (XLSX) [file pone.0179265.s004.xlsx]

## Sheet: Supplemental Table 1
Gene	Interaction Type	Reference	Pathway
Dusp6	Co-expression	Gallardo-Castrillon-2007	BIOCARTA_CERAMIDE_PATHWAY
Cebpb	Co-expression	Gallardo-Castrillon-2007	BIOCARTA_CERAMIDE_PATHWAY
Atg5	Co-expression	Rinn-Snyder-2004	BIOCARTA_CERAMIDE_PATHWAY
Pea15a	Co-expression	Harris-Stevenson-2013	BIOCARTA_CERAMIDE_PATHWAY
Ywhaq	Co-expression	Andrechek-Nevins-2009	BIOCARTA_CERAMIDE_PATHWAY
Rala	Co-expression	Akahoshi-Ishii-2011	BOGNI_TREATMENT_RELATED_MYELOID_LEUKEMIA_DN
Cdk4	Co-expression	Akahoshi-Ishii-2011	BOGNI_TREATMENT_RELATED_MYELOID_LEUKEMIA_DN
Hipk2	Co-expression	Akahoshi-Ishii-2011	BOGNI_TREATMENT_RELATED_MYELOID_LEUKEMIA_DN
Nlk	Co-expression	Schreiner-Scott-2009	BOGNI_TREATMENT_RELATED_MYELOID_LEUKEMIA_DN
Ppp2r5a	Co-expression	Schreiner-Scott-2009	BOGNI_TREATMENT_RELATED_MYELOID_LEUKEMIA_DN
Nrip1	Co-expression	Hernandez-Novoa-Kovacs-2008	BOGNI_TREATMENT_RELATED_MYELOID_LEUKEMIA_DN
Poldip2	Co-expression	Peng-Stevenson-2013	BOGNI_TREATMENT_RELATED_MYELOID_LEUKEMIA_DN
Rara	Co-expression	Singh-Darlington-2011	BOGNI_TREATMENT_RELATED_MYELOID_LEUKEMIA_DN
Ptprm	Co-expression	Singh-Darlington-2011	BOGNI_TREATMENT_RELATED_MYELOID_LEUKEMIA_DN
Ppp2r5c	Co-expression	Hovatta-Barlow-2005	BOGNI_TREATMENT_RELATED_MYELOID_LEUKEMIA_DN
Wdr77	Co-expression	Anderson-Neville-2007	BOGNI_TREATMENT_RELATED_MYELOID_LEUKEMIA_DN
Synpo	Co-expression	Anderson-Neville-2007	BOGNI_TREATMENT_RELATED_MYELOID_LEUKEMIA_DN
Exoc1	Co-expression	Harris-Stevenson-2013	BOGNI_TREATMENT_RELATED_MYELOID_LEUKEMIA_DN
Creb3l4	Physical interactions	IREF-SMALL-SCALE-STUDIES	BOGNI_TREATMENT_RELATED_MYELOID_LEUKEMIA_DN
Flot2	Co-expression	Tarnavski-Izumo-2004	CROMER_METASTASIS_DN
Krt6a	Co-expression	Tarnavski-Izumo-2004	CROMER_METASTASIS_DN
Krt14	Co-expression	Tarnavski-Izumo-2004	CROMER_METASTASIS_DN
Tacstd2	Co-expression	Tarnavski-Izumo-2004	CROMER_METASTASIS_DN
Krt17	Co-expression	Tarnavski-Izumo-2004	CROMER_METASTASIS_DN
Dynll1	Co-expression	Tarnavski-Izumo-2004	CROMER_METASTASIS_DN
Dsp	Co-expression	Tarnavski-Izumo-2004	CROMER_METASTASIS_DN
Perp	Co-expression	Tarnavski-Izumo-2004	CROMER_METASTASIS_DN
Pkp3	Co-expression	Tarnavski-Izumo-2004	CROMER_METASTASIS_DN
Lama3	Co-expression	Tarnavski-Izumo-2004	CROMER_METASTASIS_DN
Ckm	Co-expression	Tarnavski-Izumo-2004	CROMER_METASTASIS_DN
Itga6	Co-expression	Andrechek-Nevins-2009	CROMER_METASTASIS_DN
Dtx3	Co-expression	Andrechek-Nevins-2009	CROMER_METASTASIS_DN
Smug1	Shared protein domains	PFAM	KEGG_BASE_EXCISION_REPAIR
Pcna-ps2	Shared protein domains	PFAM	KEGG_BASE_EXCISION_REPAIR
Dsc1	Co-expression	Hernandez-Novoa-Kovacs-2008	CROMER_METASTASIS_DN
Dnm1	Co-expression	Hernandez-Novoa-Kovacs-2008	CROMER_METASTASIS_DN
Eml1	Co-expression	Gallardo-Castrillon-2007	CROMER_METASTASIS_DN
Cand2	Co-expression	Lattin-Sweet-2008	CROMER_METASTASIS_DN
Dcc	Co-expression	Singh-Darlington-2011	FLECHNER_BIOPSY_KIDNEY_TRANSPLANT_OK_VS_DONOR_DN
Ddx52	Co-expression	Singh-Darlington-2011	FLECHNER_BIOPSY_KIDNEY_TRANSPLANT_OK_VS_DONOR_DN
Cxxc1	Co-expression	Gallardo-Castrillon-2007	FLECHNER_BIOPSY_KIDNEY_TRANSPLANT_OK_VS_DONOR_DN
Rps9	Co-expression	Gallardo-Castrillon-2007	FLECHNER_BIOPSY_KIDNEY_TRANSPLANT_OK_VS_DONOR_DN
Grlf1	Co-expression	Anderson-Neville-2007	FLECHNER_BIOPSY_KIDNEY_TRANSPLANT_OK_VS_DONOR_DN
Dnajc1	Co-expression	Anderson-Neville-2007	FLECHNER_BIOPSY_KIDNEY_TRANSPLANT_OK_VS_DONOR_DN
A2m	Co-expression	Hovatta-Barlow-2005	FLECHNER_BIOPSY_KIDNEY_TRANSPLANT_OK_VS_DONOR_DN
Snx9	Co-expression	Hovatta-Barlow-2005	FLECHNER_BIOPSY_KIDNEY_TRANSPLANT_OK_VS_DONOR_DN
Plscr1	Co-expression	Moggs-Orphanides-2004	FLECHNER_BIOPSY_KIDNEY_TRANSPLANT_OK_VS_DONOR_DN
Snx33	Co-expression	Lattin-Sweet-2008	FLECHNER_BIOPSY_KIDNEY_TRANSPLANT_OK_VS_DONOR_DN
Slc17a9	Co-expression	Andrechek-Nevins-2009	FLECHNER_BIOPSY_KIDNEY_TRANSPLANT_OK_VS_DONOR_DN
Apbb2	Co-expression	Thorrez-Schuit-2008	FLECHNER_BIOPSY_KIDNEY_TRANSPLANT_OK_VS_DONOR_DN
Sparc	Co-expression	Zapala-Barlow-2005	GOTZMANN_EPITHELIAL_TO_MESENCHYMAL_TRANSITION_UP
Postn	Co-expression	Zapala-Barlow-2005	GOTZMANN_EPITHELIAL_TO_MESENCHYMAL_TRANSITION_UP
Col1a2	Co-expression	Zapala-Barlow-2005	GOTZMANN_EPITHELIAL_TO_MESENCHYMAL_TRANSITION_UP
Lox	Co-expression	Zapala-Barlow-2005	GOTZMANN_EPITHELIAL_TO_MESENCHYMAL_TRANSITION_UP
Nid1	Co-expression	Zapala-Barlow-2005	GOTZMANN_EPITHELIAL_TO_MESENCHYMAL_TRANSITION_UP
Smc2	Co-expression	Zapala-Barlow-2005	GOTZMANN_EPITHELIAL_TO_MESENCHYMAL_TRANSITION_UP
Fbn1	Co-expression	Zapala-Barlow-2005	GOTZMANN_EPITHELIAL_TO_MESENCHYMAL_TRANSITION_UP
Ect2	Co-expression	Zapala-Barlow-2005	GOTZMANN_EPITHELIAL_TO_MESENCHYMAL_TRANSITION_UP
Hspg2	Co-expression	Zapala-Barlow-2005	GOTZMANN_EPITHELIAL_TO_MESENCHYMAL_TRANSITION_UP
Eln	Co-expression	Zapala-Barlow-2005	GOTZMANN_EPITHELIAL_TO_MESENCHYMAL_TRANSITION_UP
Mcm4	Co-expression	Zapala-Barlow-2005	GOTZMANN_EPITHELIAL_TO_MESENCHYMAL_TRANSITION_UP
C330027C09Rik	Co-expression	Zapala-Barlow-2005	GOTZMANN_EPITHELIAL_TO_MESENCHYMAL_TRANSITION_UP
Lum	Co-expression	Zapala-Barlow-2005	GOTZMANN_EPITHELIAL_TO_MESENCHYMAL_TRANSITION_UP
Ccna2	Co-expression	Zapala-Barlow-2005	GOTZMANN_EPITHELIAL_TO_MESENCHYMAL_TRANSITION_UP
Myadm	Co-expression	Zapala-Barlow-2005	GOTZMANN_EPITHELIAL_TO_MESENCHYMAL_TRANSITION_UP
Thbs2	Co-expression	Zapala-Barlow-2005	GOTZMANN_EPITHELIAL_TO_MESENCHYMAL_TRANSITION_UP
Mad2l1	Co-expression	Zapala-Barlow-2005	GOTZMANN_EPITHELIAL_TO_MESENCHYMAL_TRANSITION_UP
Tgfbr1	Co-expression	Andrechek-Nevins-2009	HUANG_DASATINIB_RESISTANCE_UP
Gbp2	Co-expression	Andrechek-Nevins-2009	HUANG_DASATINIB_RESISTANCE_UP
Igtp	Co-expression	Andrechek-Nevins-2009	HUANG_DASATINIB_RESISTANCE_UP
Irgm2	Co-expression	Andrechek-Nevins-2009	HUANG_DASATINIB_RESISTANCE_UP
Irgm1	Co-expression	Andrechek-Nevins-2009	HUANG_DASATINIB_RESISTANCE_UP
Gbp7	Co-expression	Andrechek-Nevins-2009	HUANG_DASATINIB_RESISTANCE_UP
Mn1	Other	Disease associations-OMIM	FLECHNER_BIOPSY_KIDNEY_TRANSPLANT_OK_VS_DONOR_DN
Mcc	Other	Disease associations-OMIM	FLECHNER_BIOPSY_KIDNEY_TRANSPLANT_OK_VS_DONOR_DN
Mpo	Other	Disease associations-OMIM	FLECHNER_BIOPSY_KIDNEY_TRANSPLANT_OK_VS_DONOR_DN
Bbs5	Predicted	I2D-BIND-Fly2Mouse	FLECHNER_BIOPSY_KIDNEY_TRANSPLANT_OK_VS_DONOR_DN
Lztr1	Predicted	I2D-BIND-Fly2Mouse	FLECHNER_BIOPSY_KIDNEY_TRANSPLANT_OK_VS_DONOR_DN
Pan3	Predicted	I2D-BIND-Fly2Mouse	FLECHNER_BIOPSY_KIDNEY_TRANSPLANT_OK_VS_DONOR_DN
Ifi47	Co-expression	Andrechek-Nevins-2009	HUANG_DASATINIB_RESISTANCE_UP
Tgfb1	Co-expression	Andrechek-Nevins-2009	HUANG_DASATINIB_RESISTANCE_UP
Ilk	Co-expression	Andrechek-Nevins-2009	HUANG_DASATINIB_RESISTANCE_UP
Tap1	Co-expression	Andrechek-Nevins-2009	HUANG_DASATINIB_RESISTANCE_UP
Ly6a	Co-expression	Andrechek-Nevins-2009	HUANG_DASATINIB_RESISTANCE_UP
Cyb5r3	Co-expression	Andrechek-Nevins-2009	HUANG_DASATINIB_RESISTANCE_UP
Tpm4	Co-expression	Andrechek-Nevins-2009	HUANG_DASATINIB_RESISTANCE_UP
Il15	Co-expression	Lattin-Sweet-2008	HUANG_DASATINIB_RESISTANCE_UP
Errfi1	Co-expression	Peng-Stevenson-2013	INGA_TP53_TARGETS
Dctn2	Co-expression	Stein-Gusterson-2004	INGA_TP53_TARGETS
Ccnd2	Co-expression	Andrechek-Nevins-2009	INGA_TP53_TARGETS
Dhcr24	Co-expression	Andrechek-Nevins-2009	INGA_TP53_TARGETS
Tbl3	Co-expression	Moggs-Orphanides-2004	INGA_TP53_TARGETS
Casp3	Co-expression	Moggs-Orphanides-2004	INGA_TP53_TARGETS
Bnc1	Co-expression	Thorrez-Schuit-2008	INGA_TP53_TARGETS
Schip1	Co-expression	Harris-Stevenson-2013	INGA_TP53_TARGETS
Stxbp5	Co-localization	Siddiqui-Marra-2005	KEGG_SNARE_INTERACTIONS_IN_VESICULAR_TRANSPORT
Stxbp5l	Co-localization	Zhang-Hughes-2004	KEGG_SNARE_INTERACTIONS_IN_VESICULAR_TRANSPORT
Gm379	Shared protein domains	INTERPRO	KEGG_SNARE_INTERACTIONS_IN_VESICULAR_TRANSPORT
Cep112	Shared protein domains	INTERPRO	KEGG_SNARE_INTERACTIONS_IN_VESICULAR_TRANSPORT
Moap1	Physical interactions	IREF-BIND	INGA_TP53_TARGETS
Rpl11	Physical interactions	IREF-BIND	INGA_TP53_TARGETS
Mtbp	Physical interactions	IREF-BIND	INGA_TP53_TARGETS
Atf7	Physical interactions	IREF-BIND	INGA_TP53_TARGETS
Aplf	Co-expression	Harris-Stevenson-2013	KEGG_BASE_EXCISION_REPAIR
Snrpf	Co-expression	Harris-Stevenson-2013	KEGG_BASE_EXCISION_REPAIR
Msh6	Co-expression	Harris-Stevenson-2013	KEGG_BASE_EXCISION_REPAIR
Lrsam1	Co-expression	Harris-Stevenson-2013	KEGG_BASE_EXCISION_REPAIR
Chrac1	Co-expression	Anderson-Neville-2007	KEGG_BASE_EXCISION_REPAIR
Exo1	Co-expression	Anderson-Neville-2007	KEGG_BASE_EXCISION_REPAIR
Stk19	Co-expression	Anderson-Neville-2007	KEGG_BASE_EXCISION_REPAIR
Dr1	Co-expression	Andrechek-Nevins-2009	KEGG_BASE_EXCISION_REPAIR
Aptx	Co-expression	Andrechek-Nevins-2009	KEGG_BASE_EXCISION_REPAIR
Rab4a	Co-localization	Su-Hogenesch-2004	BOGNI_TREATMENT_RELATED_MYELOID_LEUKEMIA_DN
Polm	Co-expression	Lattin-Sweet-2008	KEGG_BASE_EXCISION_REPAIR
Gen1	Co-expression	Lattin-Sweet-2008	KEGG_BASE_EXCISION_REPAIR
Dntt	Co-expression	Lattin-Sweet-2008	KEGG_BASE_EXCISION_REPAIR
Lig4	Co-expression	Thorrez-Schuit-2008	KEGG_BASE_EXCISION_REPAIR
Rev3l	Co-expression	Peng-Stevenson-2013	KEGG_BASE_EXCISION_REPAIR
Tle1	Co-expression	Hovatta-Barlow-2005	KEGG_BASE_EXCISION_REPAIR
Ercc5	Co-expression	Akerblad-Sigvardsson-2005	KEGG_BASE_EXCISION_REPAIR
Stx4a	Co-expression	Tarnavski-Izumo-2004	KEGG_SNARE_INTERACTIONS_IN_VESICULAR_TRANSPORT
Azi1	Co-expression	Tarnavski-Izumo-2004	KEGG_SNARE_INTERACTIONS_IN_VESICULAR_TRANSPORT
Aimp1	Co-expression	Tarnavski-Izumo-2004	KEGG_SNARE_INTERACTIONS_IN_VESICULAR_TRANSPORT
Aven	Predicted	PPI-OPHID	SA_PROGRAMMED_CELL_DEATH
Tmbim6	Predicted	PPI-OPHID	SA_PROGRAMMED_CELL_DEATH
Atpaf1	Predicted	I2D-MINT-Human2Mouse	SA_PROGRAMMED_CELL_DEATH
Bcl2a1d	Predicted	Guan-Troyanskaya-2008 MouseNET	SA_PROGRAMMED_CELL_DEATH
Bcl2l13	Predicted	Guan-Troyanskaya-2008 MouseNET	SA_PROGRAMMED_CELL_DEATH
Bcl2a1c	Shared protein domains	INTERPRO	SA_PROGRAMMED_CELL_DEATH
Bcl2a1b	Shared protein domains	INTERPRO	SA_PROGRAMMED_CELL_DEATH
Clip2	Co-expression	Hernandez-Novoa-Kovacs-2008	KEGG_SNARE_INTERACTIONS_IN_VESICULAR_TRANSPORT
Stx5a	Co-expression	Hovatta-Barlow-2005	KEGG_SNARE_INTERACTIONS_IN_VESICULAR_TRANSPORT
Napa	Co-expression	Hovatta-Barlow-2005	KEGG_SNARE_INTERACTIONS_IN_VESICULAR_TRANSPORT
Lztfl1	Co-expression	Thorrez-Schuit-2008	KEGG_SNARE_INTERACTIONS_IN_VESICULAR_TRANSPORT
Uaca	Co-expression	Thorrez-Schuit-2008	KEGG_SNARE_INTERACTIONS_IN_VESICULAR_TRANSPORT
Gcc1	Co-expression	Thorrez-Schuit-2008	KEGG_SNARE_INTERACTIONS_IN_VESICULAR_TRANSPORT
Ift57	Co-expression	Andrechek-Nevins-2009	KEGG_SNARE_INTERACTIONS_IN_VESICULAR_TRANSPORT
Tmcc2	Co-expression	Andrechek-Nevins-2009	KEGG_SNARE_INTERACTIONS_IN_VESICULAR_TRANSPORT
Vps16	Co-expression	Jacobs-Benoist-2010	KEGG_SNARE_INTERACTIONS_IN_VESICULAR_TRANSPORT
Vps53	Co-expression	Jacobs-Benoist-2010	KEGG_SNARE_INTERACTIONS_IN_VESICULAR_TRANSPORT
Exoc5	Co-expression	Peng-Stevenson-2013	KEGG_SNARE_INTERACTIONS_IN_VESICULAR_TRANSPORT
Abi2	Co-expression	Peng-Stevenson-2013	KEGG_SNARE_INTERACTIONS_IN_VESICULAR_TRANSPORT
Stxbp6	Co-expression	Lattin-Sweet-2008	KEGG_SNARE_INTERACTIONS_IN_VESICULAR_TRANSPORT
Epcam	Co-expression	Stein-Gusterson-2004	LANDIS_BREAST_CANCER_PROGRESSION_UP
Esrp1	Co-expression	Stein-Gusterson-2004	LANDIS_BREAST_CANCER_PROGRESSION_UP
Ceacam1	Co-expression	Stein-Gusterson-2004	LANDIS_BREAST_CANCER_PROGRESSION_UP
Rhpn2	Co-expression	Stein-Gusterson-2004	LANDIS_BREAST_CANCER_PROGRESSION_UP
Wfdc18	Co-expression	Stein-Gusterson-2004	LANDIS_BREAST_CANCER_PROGRESSION_UP
1600029D21Rik	Co-expression	Stein-Gusterson-2004	LANDIS_BREAST_CANCER_PROGRESSION_UP
Sh3bgrl2	Co-expression	Stein-Gusterson-2004	LANDIS_BREAST_CANCER_PROGRESSION_UP
Tm9sf3	Co-expression	Stein-Gusterson-2004	LANDIS_BREAST_CANCER_PROGRESSION_UP
Cdcp1	Co-expression	Stein-Gusterson-2004	LANDIS_BREAST_CANCER_PROGRESSION_UP
Erbb3	Co-expression	Stein-Gusterson-2004	LANDIS_BREAST_CANCER_PROGRESSION_UP
Crb3	Co-expression	Stein-Gusterson-2004	LANDIS_BREAST_CANCER_PROGRESSION_UP
Tmem30b	Co-expression	Stein-Gusterson-2004	LANDIS_BREAST_CANCER_PROGRESSION_UP
Serinc3	Co-expression	Stein-Gusterson-2004	LANDIS_BREAST_CANCER_PROGRESSION_UP
Arhgef5	Co-expression	Stein-Gusterson-2004	LANDIS_BREAST_CANCER_PROGRESSION_UP
Knop1	Co-expression	Stein-Gusterson-2004	LANDIS_BREAST_CANCER_PROGRESSION_UP
Krt18	Co-expression	Stein-Gusterson-2004	LANDIS_BREAST_CANCER_PROGRESSION_UP
Krt8	Co-expression	Stein-Gusterson-2004	LANDIS_BREAST_CANCER_PROGRESSION_UP
Arfgap3	Co-expression	Stein-Gusterson-2004	LANDIS_BREAST_CANCER_PROGRESSION_UP
Etfa	Co-expression	Thorrez-Schuit-2008	MOOTHA_FFA_OXYDATION
Ech1	Co-expression	Thorrez-Schuit-2008	MOOTHA_FFA_OXYDATION
Ccdc111	Shared protein domains	PFAM	REACTOME_POL_SWITCHING
5033411D12Rik	Co-expression	Thorrez-Schuit-2008	MOOTHA_FFA_OXYDATION
Hsdl2	Co-expression	Thorrez-Schuit-2008	MOOTHA_FFA_OXYDATION
Plin5	Co-expression	Thorrez-Schuit-2008	MOOTHA_FFA_OXYDATION
Slc25a20	Co-expression	Thorrez-Schuit-2008	MOOTHA_FFA_OXYDATION
Etfb	Co-expression	Thorrez-Schuit-2008	MOOTHA_FFA_OXYDATION
Eci2	Co-expression	Thorrez-Schuit-2008	MOOTHA_FFA_OXYDATION
Ivd	Co-expression	Thorrez-Schuit-2008	MOOTHA_FFA_OXYDATION
Ptgr2	Co-expression	Thorrez-Schuit-2008	MOOTHA_FFA_OXYDATION
Hibadh	Co-expression	Thorrez-Schuit-2008	MOOTHA_FFA_OXYDATION
Hibch	Co-expression	Thorrez-Schuit-2008	MOOTHA_FFA_OXYDATION
Tmem216	Predicted	I2D-IntAct-Human2Mouse	NIKOLSKY_BREAST_CANCER_21Q22_AMPLICON
Ptbp2	Predicted	I2D-IntAct-Human2Mouse	NIKOLSKY_BREAST_CANCER_21Q22_AMPLICON
Nudt5	Predicted	I2D-IntAct-Human2Mouse	NIKOLSKY_BREAST_CANCER_21Q22_AMPLICON
Aktip	Predicted	I2D-IntAct-Human2Mouse	NIKOLSKY_BREAST_CANCER_21Q22_AMPLICON
Celsr3	Predicted	I2D-IntAct-Human2Mouse	NIKOLSKY_BREAST_CANCER_21Q22_AMPLICON
Disc1	Predicted	I2D-IntAct-Human2Mouse	NIKOLSKY_BREAST_CANCER_21Q22_AMPLICON
Ndufs8	Predicted	I2D-IntAct-Human2Mouse	NIKOLSKY_BREAST_CANCER_21Q22_AMPLICON
Arf6	Predicted	I2D-IntAct-Human2Mouse	NIKOLSKY_BREAST_CANCER_21Q22_AMPLICON
Pofut1	Shared protein domains	PFAM	NIKOLSKY_BREAST_CANCER_21Q22_AMPLICON
Acad12	Co-expression	Thorrez-Schuit-2008	MOOTHA_FFA_OXYDATION
Etfdh	Co-expression	Thorrez-Schuit-2008	MOOTHA_FFA_OXYDATION
Clybl	Co-expression	Thorrez-Schuit-2008	MOOTHA_FFA_OXYDATION
Dbt	Co-expression	Thorrez-Schuit-2008	MOOTHA_FFA_OXYDATION
D2hgdh	Co-expression	Thorrez-Schuit-2008	MOOTHA_FFA_OXYDATION
Lmf1	Co-expression	Harris-Stevenson-2013	MOOTHA_FFA_OXYDATION
Oasl2	Co-expression	Andrechek-Nevins-2009	MOSERLE_IFNA_RESPONSE
Irf7	Co-expression	Andrechek-Nevins-2009	MOSERLE_IFNA_RESPONSE
Parp9	Co-expression	Andrechek-Nevins-2009	MOSERLE_IFNA_RESPONSE
Parp14	Co-expression	Andrechek-Nevins-2009	MOSERLE_IFNA_RESPONSE
Dhx58	Co-expression	Andrechek-Nevins-2009	MOSERLE_IFNA_RESPONSE
Stat2	Co-expression	Andrechek-Nevins-2009	MOSERLE_IFNA_RESPONSE
Chst1	Predicted	I2D-Rual-Vidal-2004-core-Human2Mouse	INGA_TP53_TARGETS
Mark3	Predicted	I2D-Rual-Vidal-2004-core-Human2Mouse	INGA_TP53_TARGETS
Mx2	Co-expression	Andrechek-Nevins-2009	MOSERLE_IFNA_RESPONSE
Slfn8	Co-expression	Andrechek-Nevins-2009	MOSERLE_IFNA_RESPONSE
Trim25	Co-expression	Andrechek-Nevins-2009	MOSERLE_IFNA_RESPONSE
Zbp1	Co-expression	Andrechek-Nevins-2009	MOSERLE_IFNA_RESPONSE
Gbp6	Co-expression	Andrechek-Nevins-2009	MOSERLE_IFNA_RESPONSE
Xaf1	Co-expression	Peng-Stevenson-2013	MOSERLE_IFNA_RESPONSE
Isg15	Co-expression	Jacobs-Benoist-2010	MOSERLE_IFNA_RESPONSE
Col6a3	Co-expression	Stein-Gusterson-2004	NIKOLSKY_BREAST_CANCER_21Q22_AMPLICON
Eny2	Co-expression	Gallardo-Castrillon-2007	NIKOLSKY_BREAST_CANCER_21Q22_AMPLICON
Gem	Co-expression	Rinn-Snyder-2004	NIKOLSKY_BREAST_CANCER_21Q22_AMPLICON
Rabgap1	Co-expression	Rinn-Snyder-2004	NIKOLSKY_BREAST_CANCER_21Q22_AMPLICON
Rnps1	Co-expression	Rinn-Snyder-2004	NIKOLSKY_BREAST_CANCER_21Q22_AMPLICON
Clstn1	Co-expression	Peng-Stevenson-2013	NIKOLSKY_BREAST_CANCER_21Q22_AMPLICON
Akap9	Co-expression	Peng-Stevenson-2013	NIKOLSKY_BREAST_CANCER_21Q22_AMPLICON
Rbm10	Co-expression	Lattin-Sweet-2008	NIKOLSKY_BREAST_CANCER_21Q22_AMPLICON
Tgm2	Co-expression	Anderson-Neville-2007	NIKOLSKY_BREAST_CANCER_21Q22_AMPLICON
Tnik	Co-expression	Harris-Stevenson-2013	NIKOLSKY_BREAST_CANCER_21Q22_AMPLICON
Mcl1	Co-expression	Rinn-Snyder-2004	PID_CERAMIDE_PATHWAY
Cflar	Co-expression	Gallardo-Castrillon-2007	PID_CERAMIDE_PATHWAY
Trpc4ap	Co-expression	Gallardo-Castrillon-2007	PID_CERAMIDE_PATHWAY
Traf1	Co-expression	Gallardo-Castrillon-2007	PID_CERAMIDE_PATHWAY
Fas	Co-expression	Lattin-Sweet-2008	PID_CERAMIDE_PATHWAY
Ikbkg	Co-expression	Lattin-Sweet-2008	PID_CERAMIDE_PATHWAY
Stat3	Co-expression	Lattin-Sweet-2008	PID_CERAMIDE_PATHWAY
Tnfrsf1b	Co-expression	Lattin-Sweet-2008	PID_CERAMIDE_PATHWAY
Lamtor2	Co-expression	Anderson-Neville-2007	PID_CERAMIDE_PATHWAY
Brap	Co-expression	Jacobs-Benoist-2010	PID_CERAMIDE_PATHWAY
Bcl2l2	Co-expression	Jacobs-Benoist-2010	PID_CERAMIDE_PATHWAY
Braf	Co-expression	Hernandez-Novoa-Kovacs-2008	PID_CERAMIDE_PATHWAY
Casp2	Co-expression	Stein-Gusterson-2004	PID_CERAMIDE_PATHWAY
Mapk8ip3	Co-expression	Hovatta-Barlow-2005	PID_CERAMIDE_PATHWAY
Lrdd	Physical interactions	IREF-BIOGRID	PID_CERAMIDE_PATHWAY
Bcl2a1a	Physical interactions	IREF-BIOGRID	PID_CERAMIDE_PATHWAY
Notch1	Co-expression	Gallardo-Castrillon-2007	REACTOME_NOTCH_HLH_TRANSCRIPTION_PATHWAY
Dll1	Co-expression	Gallardo-Castrillon-2007	REACTOME_NOTCH_HLH_TRANSCRIPTION_PATHWAY
Egfl7	Co-expression	Gallardo-Castrillon-2007	REACTOME_NOTCH_HLH_TRANSCRIPTION_PATHWAY
Taf5l	Co-expression	Gallardo-Castrillon-2007	REACTOME_NOTCH_HLH_TRANSCRIPTION_PATHWAY
Gli3	Co-expression	Moggs-Orphanides-2004	REACTOME_NOTCH_HLH_TRANSCRIPTION_PATHWAY
Ncor2	Co-expression	Moggs-Orphanides-2004	REACTOME_NOTCH_HLH_TRANSCRIPTION_PATHWAY
Jag2	Co-expression	Moggs-Orphanides-2004	REACTOME_NOTCH_HLH_TRANSCRIPTION_PATHWAY
Cpe	Predicted	I2D-IntAct-Human2Mouse	REACTOME_PROCESSIVE_SYNTHESIS_ON_THE_LAGGING_STRAND
Cntn1	Co-expression	Moggs-Orphanides-2004	REACTOME_NOTCH_HLH_TRANSCRIPTION_PATHWAY
Dll4	Co-expression	Peng-Stevenson-2013	REACTOME_NOTCH_HLH_TRANSCRIPTION_PATHWAY
Aph1a	Co-expression	Peng-Stevenson-2013	REACTOME_NOTCH_HLH_TRANSCRIPTION_PATHWAY
Phf2	Physical interactions	IREF-BIOGRID	REACTOME_NOTCH_HLH_TRANSCRIPTION_PATHWAY
Tada2a	Physical interactions	IREF-SMALL-SCALE-STUDIES	REACTOME_NOTCH_HLH_TRANSCRIPTION_PATHWAY
Prpf38a	Co-expression	Zapala-Barlow-2005	REACTOME_POL_SWITCHING
Poldip3	Co-expression	Zapala-Barlow-2005	REACTOME_POL_SWITCHING
Wdhd1	Co-expression	Zapala-Barlow-2005	REACTOME_POL_SWITCHING
Rel	Co-expression	Zapala-Barlow-2005	REACTOME_POL_SWITCHING
Chaf1a	Co-expression	Anderson-Neville-2007	REACTOME_POL_SWITCHING
Chtf18	Co-expression	Thorrez-Schuit-2008	REACTOME_POL_SWITCHING
Cnot8	Co-expression	Thorrez-Schuit-2008	REACTOME_POL_SWITCHING
Rqcd1	Co-expression	Thorrez-Schuit-2008	REACTOME_POL_SWITCHING
Mrpl38	Co-expression	Andrechek-Nevins-2009	REACTOME_POL_SWITCHING
Cnot6	Co-expression	Andrechek-Nevins-2009	REACTOME_POL_SWITCHING
Enoph1	Co-expression	Andrechek-Nevins-2009	REACTOME_POL_SWITCHING
Lsm6	Co-expression	Lattin-Sweet-2008	REACTOME_POL_SWITCHING
Metap2	Co-expression	Gallardo-Castrillon-2007	REACTOME_POL_SWITCHING
Mlkl	Co-localization	Zhang-Hughes-2004	MOOTHA_FFA_OXYDATION
Gm7535	Shared protein domains	PFAM	MOOTHA_FFA_OXYDATION
Uso1	Co-expression	Rinn-Snyder-2004	REACTOME_POL_SWITCHING
Stk40	Co-expression	Peng-Stevenson-2013	REACTOME_POL_SWITCHING
Kctd13	Co-expression	Harris-Stevenson-2013	REACTOME_POL_SWITCHING
Tipin	Co-expression	Zapala-Barlow-2005	REACTOME_PROCESSIVE_SYNTHESIS_ON_THE_LAGGING_STRAND
Timeless	Co-expression	Zapala-Barlow-2005	REACTOME_PROCESSIVE_SYNTHESIS_ON_THE_LAGGING_STRAND
Blm	Co-expression	Zapala-Barlow-2005	REACTOME_PROCESSIVE_SYNTHESIS_ON_THE_LAGGING_STRAND
Fam96b	Co-expression	Boivin-Vidal-2012	REACTOME_PROCESSIVE_SYNTHESIS_ON_THE_LAGGING_STRAND
Rmi1	Co-expression	Boivin-Vidal-2012	REACTOME_PROCESSIVE_SYNTHESIS_ON_THE_LAGGING_STRAND
Rassf5	Co-expression	Gallardo-Castrillon-2007	REACTOME_SOS_MEDIATED_SIGNALLING
Shoc2	Co-expression	Akerblad-Sigvardsson-2005	REACTOME_SOS_MEDIATED_SIGNALLING
Psen2	Other	Phenotype-MGI	REACTOME_NOTCH_HLH_TRANSCRIPTION_PATHWAY
Psen1	Other	Phenotype-MGI	REACTOME_NOTCH_HLH_TRANSCRIPTION_PATHWAY
Ep300	Other	Phenotype-MGI	REACTOME_NOTCH_HLH_TRANSCRIPTION_PATHWAY
Psenen	Pathway	PATHWAYCOMMONS-CELL_MAP	REACTOME_NOTCH_HLH_TRANSCRIPTION_PATHWAY
Aph1b	Pathway	PATHWAYCOMMONS-CELL_MAP	REACTOME_NOTCH_HLH_TRANSCRIPTION_PATHWAY
Gab1	Co-expression	Akerblad-Sigvardsson-2005	REACTOME_SOS_MEDIATED_SIGNALLING
Igf1r	Co-expression	Tarnavski-Izumo-2004	REACTOME_SOS_MEDIATED_SIGNALLING
Cir1	Predicted	I2D-HPRD-Human2Mouse	REACTOME_NOTCH_HLH_TRANSCRIPTION_PATHWAY
Zfp236	Predicted	Guan-Troyanskaya-2008 MouseNET	REACTOME_NOTCH_HLH_TRANSCRIPTION_PATHWAY
Kcnk3	Co-expression	Tarnavski-Izumo-2004	REACTOME_SOS_MEDIATED_SIGNALLING
Il4ra	Co-expression	Stein-Gusterson-2004	REACTOME_SOS_MEDIATED_SIGNALLING
Ptprr	Co-expression	Hovatta-Barlow-2005	REACTOME_SOS_MEDIATED_SIGNALLING
Tlk2	Physical interactions	IREF-MPPI	REACTOME_SOS_MEDIATED_SIGNALLING
Pik3r3	Physical interactions	IREF-MPPI	REACTOME_SOS_MEDIATED_SIGNALLING
Ptpn5	Predicted	PPI-OPHID	BIOCARTA_CERAMIDE_PATHWAY
Bok	Co-expression	Rinn-Snyder-2004	SA_PROGRAMMED_CELL_DEATH
Bik	Co-expression	Stein-Gusterson-2004	SA_PROGRAMMED_CELL_DEATH
Sp100	Co-expression	Stein-Gusterson-2004	SA_PROGRAMMED_CELL_DEATH
Card11	Co-expression	Harris-Stevenson-2013	SA_PROGRAMMED_CELL_DEATH
Dnm1l	Co-expression	Harris-Stevenson-2013	SA_PROGRAMMED_CELL_DEATH
Bcl2l14	Co-expression	Peng-Stevenson-2013	SA_PROGRAMMED_CELL_DEATH
Bmf	Physical interactions	IREF-BIND	SA_PROGRAMMED_CELL_DEATH
Rfxank	Co-localization	Su-Hogenesch-2004	REACTOME_SOS_MEDIATED_SIGNALLING
Ralgds	Co-localization	Siddiqui-Marra-2005	REACTOME_SOS_MEDIATED_SIGNALLING
Jak2	Co-localization	Siddiqui-Marra-2005	REACTOME_SOS_MEDIATED_SIGNALLING
Rit2	Co-localization	Zhang-Hughes-2004	REACTOME_SOS_MEDIATED_SIGNALLING
Gpr15	Co-localization	Zhang-Hughes-2004	REACTOME_SOS_MEDIATED_SIGNALLING
Minpp1	Other	Disease associations-OMIM	REACTOME_SOS_MEDIATED_SIGNALLING
Araf	Other	Phenotype-MGI	REACTOME_SOS_MEDIATED_SIGNALLING
Irx2	Other	Phenotype-MGI	REACTOME_SOS_MEDIATED_SIGNALLING
Bcl2l10	Physical interactions	IREF-INTACT	SA_PROGRAMMED_CELL_DEATH
Hrk	Physical interactions	IREF-INTACT	SA_PROGRAMMED_CELL_DEATH
SERPINH1	Co-expression	Akerblad-Sigvardsson-2005	MILI_PSEUDOPODIA_CHEMOTAXIS_DN
COL4A2	Co-expression	Akerblad-Sigvardsson-2005	MILI_PSEUDOPODIA_CHEMOTAXIS_DN
MANF	Co-expression	Akerblad-Sigvardsson-2005	MILI_PSEUDOPODIA_CHEMOTAXIS_DN
CRTAP	Co-expression	Akerblad-Sigvardsson-2005	MILI_PSEUDOPODIA_CHEMOTAXIS_DN
PRKCSH	Co-expression	Akerblad-Sigvardsson-2005	MILI_PSEUDOPODIA_CHEMOTAXIS_DN
LEPREL2	Co-expression	Akerblad-Sigvardsson-2005	MILI_PSEUDOPODIA_CHEMOTAXIS_DN
LAMB1	Co-expression	Akerblad-Sigvardsson-2005	MILI_PSEUDOPODIA_CHEMOTAXIS_DN
HSP90B1	Co-expression	Akerblad-Sigvardsson-2005	MILI_PSEUDOPODIA_CHEMOTAXIS_DN
CYR61	Co-expression	Akerblad-Sigvardsson-2005	MILI_PSEUDOPODIA_CHEMOTAXIS_DN
SEC31A	Co-expression	Akerblad-Sigvardsson-2005	MILI_PSEUDOPODIA_CHEMOTAXIS_DN
CTSA	Co-expression	Akerblad-Sigvardsson-2005	MILI_PSEUDOPODIA_CHEMOTAXIS_DN
NID1	Co-expression	Akerblad-Sigvardsson-2005	MILI_PSEUDOPODIA_CHEMOTAXIS_DN
TPM4	Co-expression	Akerblad-Sigvardsson-2005	MILI_PSEUDOPODIA_CHEMOTAXIS_DN
NUCB1	Co-expression	Akerblad-Sigvardsson-2005	MILI_PSEUDOPODIA_CHEMOTAXIS_DN
HEXA	Co-expression	Akerblad-Sigvardsson-2005	MILI_PSEUDOPODIA_CHEMOTAXIS_DN
ANXA5	Co-expression	Akerblad-Sigvardsson-2005	MILI_PSEUDOPODIA_CHEMOTAXIS_DN
0610031J06RIK	Co-expression	Akerblad-Sigvardsson-2005	MILI_PSEUDOPODIA_CHEMOTAXIS_DN
PLOD3	Co-expression	Akerblad-Sigvardsson-2005	MILI_PSEUDOPODIA_CHEMOTAXIS_DN
TPP1	Co-expression	Akerblad-Sigvardsson-2005	MILI_PSEUDOPODIA_CHEMOTAXIS_DN
COL6A2	Co-expression	Akerblad-Sigvardsson-2005	MILI_PSEUDOPODIA_CHEMOTAXIS_DN
