# Supplementary material for: Cancer cell redirection biomarker discovery using a mutual information approach
Source: PLoS One. 2017 Jun 8;12(6):e0179265. doi: 10.1371/journal.pone.0179265 (PMC5464651; doi:10.1371/journal.pone.0179265)
Supplement: S5 Table — (XLSX) [file pone.0179265.s006.xlsx]

## Sheet: Supplemental Table 3
Molecular Signature	Original			p < 0.0001				p < 0.001				p < 0.01
	Num Genes	Original MI Ratio	Percentile	Genes Added	Combined MI Ratio	Percentile	Change in Ratio	Genes Added	Combined MI Ratio	Percentile	Change in Ratio	Genes Added	Combined MI Ratio	Percentile	Change in Ratio
REACTOME_SOS_MEDIATED_SIGNALLING	14	12.726	100	1	15.812	100	3.086	1	15.812	100	3.086	4	3.55	95	-9.176
BIOCARTA_CERAMIDE_PATHWAY	22	9.05	100	0	9.05	100	0	0	9.05	100	0	1	7.366	100	-1.684
REACTOME_NOTCH_HLH_TRANSCRIPTION_PATHWAY	12	8.565	100	0	8.565	100	0	0	8.565	100	0	7	3.601	96	-4.964
MOOTHA_FFA_OXYDATION	22	7.557	100	0	7.557	100	0	1	7.315	100	-0.242	5	6.559	100	-0.998
REACTOME_PROCESSIVE_SYNTHESIS_ON_THE_LAGGING_STRAND	15	7.217	100	0	7.217	100	0	1	8.683	100	1.466	1	8.683	100	1.466
LANDIS_BREAST_CANCER_PROGRESSION_UP	42	7.141	100	2	6.551	100	-0.59	2	6.551	100	-0.59	6	6.345	100	-0.796
GOTZMANN_EPITHELIAL_TO_MESENCHYMAL_TRANSITION_UP	66	7.134	100	3	7.578	100	0.444	5	9.394	100	2.26	7	9.556	100	2.422
INGA_TP53_TARGETS	15	6.573	100	1	6.848	100	0.275	4	5.58	100	-0.993	7	2.846	72	-3.727
NIKOLSKY_BREAST_CANCER_21Q22_AMPLICON	13	6.494	100	0	6.494	100	0	5	4.568	100	-1.926	5	4.568	100	-1.926
REACTOME_POL_SWITCHING	13	6.49	100	0	6.49	100	0	3	6.048	100	-0.442	7	6.287	100	-0.203
CROMER_METASTASIS_DN	78	6.381	100	3	7.466	100	1.085	7	8.03	100	1.649	10	6.429	100	0.048
SA_PROGRAMMED_CELL_DEATH	11	6.331	100	0	6.331	100	0	1	6.914	100	0.583	9	1.497	5	-4.834
BOGNI_TREATMENT_RELATED_MYELOID_LEUKEMIA_DN	28	6.153	100	0	6.153	100	0	4	5.348	100	-0.805	10	5.023	100	-1.13
KEGG_SNARE_INTERACTIONS_IN_VESICULAR_TRANSPORT	34	6.134	100	0	6.134	100	0	0	6.134	100	0	4	6.226	100	0.092
FLECHNER_BIOPSY_KIDNEY_TRANSPLANT_OK_VS_DONOR_DN	22	5.964	100	0	5.964	100	0	1	5.167	100	-0.797	6	3.474	94	-2.49
MOSERLE_IFNA_RESPONSE	22	5.842	100	0	5.842	100	0	2	5.983	100	0.141	6	3.708	97	-2.134
HUANG_DASATINIB_RESISTANCE_UP	73	5.836	100	0	5.836	100	0	2	4.739	100	-1.097	5	4.787	100	-1.049
KEGG_BASE_EXCISION_REPAIR	32	5.835	100	0	5.835	100	0	1	5.637	100	-0.198	3	4.38	99	-1.455
PID_CERAMIDE_PATHWAY	48	5.824	100	1	5.536	100	-0.288	2	4.526	100	-1.298	6	4.594	100	-1.23
MILI_PSEUDOPODIA_CHEMOTAXIS_DN	425	5.817	100	2	5.869	100	0.052	7	5.816	100	-0.001	10	5.83	100	0.013
						avg=	0.2032			avg=	0.0398			avg=	-1.68775
