# Supplementary material for: Cancer cell redirection biomarker discovery using a mutual information approach
Source: PLoS One. 2017 Jun 8;12(6):e0179265. doi: 10.1371/journal.pone.0179265 (PMC5464651; doi:10.1371/journal.pone.0179265)
Supplement: S6 Table — Genes added by interaction are indicated as well as those identified as core biomarkers are indicated. (XLSX) [file pone.0179265.s007.xlsx]

## Sheet: README
Probe set list	Probe sets/transcripts for which expression level was measured; note that a few genes had no corresponding probe sets in the assay and could not be judge for significant differential expression
Molecular signature list	Broad Institute molecular signatures of which this gene is a member
Differentially Expressed	1 = Expression levels for this gene differ significantly (p < 0.0001) between A and B and E and B but do not differ significantly (p > 0.1) between A and E
Extended	1 = Added to the original Broad molecular signature gene pool by physical or co-expression interactions

## Sheet: Supplemental Table 5
Gene name	Probe set list	Molecular signature list	Differentially Expressed	Extended
Acadl	10355246	MOOTHA_FFA_OXYDATION	1	0
Acox1	10393177	BOGNI_TREATMENT_RELATED_MYELOID_LEUKEMIA_DN	1	0
Acta2	10467124	GOTZMANN_EPITHELIAL_TO_MESENCHYMAL_TRANSITION_UP	1	0
Ahctf1	10360589	MILI_PSEUDOPODIA_CHEMOTAXIS_DN	1	0
Aim1	10368947	LANDIS_BREAST_CANCER_PROGRESSION_UP	1	0
Angptl2	10471555	MILI_PSEUDOPODIA_CHEMOTAXIS_DN	1	0
Antxr2	10531560	HUANG_DASATINIB_RESISTANCE_UP	1	0
Anxa5	10497817	MILI_PSEUDOPODIA_CHEMOTAXIS_DN	1	1
App	10440491	MILI_PSEUDOPODIA_CHEMOTAXIS_DN	1	0
Asah1	10578361	PID_CERAMIDE_PATHWAY	1	0
Atp1a1	10500685	MILI_PSEUDOPODIA_CHEMOTAXIS_DN	1	0
Atp5b	10367106, 10367118	FLECHNER_BIOPSY_KIDNEY_TRANSPLANT_OK_VS_DONOR_DN	1	0
Atp5d	10364696	CROMER_METASTASIS_DN	1	0
Atp6ap2	10598664	LANDIS_BREAST_CANCER_PROGRESSION_UP	1	0
Atp6v1a	10439566	LANDIS_BREAST_CANCER_PROGRESSION_UP	1	0
Atpif1	10516943	MILI_PSEUDOPODIA_CHEMOTAXIS_DN	1	0
Axl	10561104	MILI_PSEUDOPODIA_CHEMOTAXIS_DN	1	0
Bmp1	10421361	CROMER_METASTASIS_DN, MILI_PSEUDOPODIA_CHEMOTAXIS_DN	1	0
Cald1	10537184	HUANG_DASATINIB_RESISTANCE_UP, MILI_PSEUDOPODIA_CHEMOTAXIS_DN	1	0
Casp8	10346564	BIOCARTA_CERAMIDE_PATHWAY, PID_CERAMIDE_PATHWAY	1	0
Cast	10410656	HUANG_DASATINIB_RESISTANCE_UP	1	0
Ccng1	10385271	INGA_TP53_TARGETS, BOGNI_TREATMENT_RELATED_MYELOID_LEUKEMIA_DN	1	0
Cct6a	10338927, 10526069, 10526085	GOTZMANN_EPITHELIAL_TO_MESENCHYMAL_TRANSITION_UP	1	0
Cpsf7	10338789, 10341591, 10338972, 10338254, 10343284, 10338791, 10339419, 10339057, 10341387, 10342750, 10343570, 10461475, 10338176	MILI_PSEUDOPODIA_CHEMOTAXIS_DN	1	0
Cpt1a	10460157	MOOTHA_FFA_OXYDATION	1	0
Crebbp	10437330, 10437332	REACTOME_NOTCH_HLH_TRANSCRIPTION_PATHWAY	1	0
Ctgf	10362201	GOTZMANN_EPITHELIAL_TO_MESENCHYMAL_TRANSITION_UP	1	0
Ctnnb1	10590325	MILI_PSEUDOPODIA_CHEMOTAXIS_DN	1	0
Ctsd	10569319	PID_CERAMIDE_PATHWAY	1	0
Cyp1b1	10453057	GOTZMANN_EPITHELIAL_TO_MESENCHYMAL_TRANSITION_UP	1	0
Dag1	10596893	MILI_PSEUDOPODIA_CHEMOTAXIS_DN	1	0
Dap	10423498	LANDIS_BREAST_CANCER_PROGRESSION_UP	1	0
Ddx17	10430536	BOGNI_TREATMENT_RELATED_MYELOID_LEUKEMIA_DN	1	0
Ddx58	10512067	MOSERLE_IFNA_RESPONSE	1	0
Ecm1	10500204	MILI_PSEUDOPODIA_CHEMOTAXIS_DN	1	0
Epcam	10447383	LANDIS_BREAST_CANCER_PROGRESSION_UP	1	1
Esyt1	10373407	MILI_PSEUDOPODIA_CHEMOTAXIS_DN	1	0
Fads3	10461423	MILI_PSEUDOPODIA_CHEMOTAXIS_DN	1	0
Fbln2	10540085	GOTZMANN_EPITHELIAL_TO_MESENCHYMAL_TRANSITION_UP, MILI_PSEUDOPODIA_CHEMOTAXIS_DN	1	0
Fgfr1	10570982	MILI_PSEUDOPODIA_CHEMOTAXIS_DN	1	0
Flnb	10412562	CROMER_METASTASIS_DN, MILI_PSEUDOPODIA_CHEMOTAXIS_DN	1	0
Fn1	10355403	GOTZMANN_EPITHELIAL_TO_MESENCHYMAL_TRANSITION_UP, MILI_PSEUDOPODIA_CHEMOTAXIS_DN	1	0
Fxyd3	10562223	LANDIS_BREAST_CANCER_PROGRESSION_UP, CROMER_METASTASIS_DN	1	0
Gab1	10579925	REACTOME_SOS_MEDIATED_SIGNALLING	1	1
Ganab	10461277	MILI_PSEUDOPODIA_CHEMOTAXIS_DN	1	0
Gnb1	10511069	MILI_PSEUDOPODIA_CHEMOTAXIS_DN	1	0
Gng12	10538842	HUANG_DASATINIB_RESISTANCE_UP	1	0
Gns	10366667	MILI_PSEUDOPODIA_CHEMOTAXIS_DN	1	0
Grn	10381588	MILI_PSEUDOPODIA_CHEMOTAXIS_DN	1	0
H3f3b	10500896, 10393058	MILI_PSEUDOPODIA_CHEMOTAXIS_DN	1	0
Hadha	10528929	MOOTHA_FFA_OXYDATION	1	0
Hmgb1	10582835, 10408687, 10386949, 10429455, 10552337, 10497483, 10600545, 10566142, 10424413, 10394142, 10548600, 10591881, 10453252, 10570470, 10497325, 10353341, 10604663, 10500543, 10542038, 10510194, 10510212, 10402750, 10535894, 10565589, 10400153, 10462361, 10553857, 10496835, 10455439, 10385426, 10569994, 10531579	GOTZMANN_EPITHELIAL_TO_MESENCHYMAL_TRANSITION_UP, KEGG_BASE_EXCISION_REPAIR	1	0
Hspa5	10471586	MILI_PSEUDOPODIA_CHEMOTAXIS_DN	1	0
Hspa8	10528021, 10584572, 10368025, 10584576, 10584578, 10584580	MILI_PSEUDOPODIA_CHEMOTAXIS_DN	1	0
Ifi44	10502791	MOSERLE_IFNA_RESPONSE	1	0
Igfbp7	10530841	GOTZMANN_EPITHELIAL_TO_MESENCHYMAL_TRANSITION_UP	1	0
Itga6	10472820	CROMER_METASTASIS_DN	1	1
Itgb1	10576661	GOTZMANN_EPITHELIAL_TO_MESENCHYMAL_TRANSITION_UP, MILI_PSEUDOPODIA_CHEMOTAXIS_DN	1	0
Klf3	10522051	MILI_PSEUDOPODIA_CHEMOTAXIS_DN	1	0
Lmf2	10431528	MOOTHA_FFA_OXYDATION	1	0
Lrp1	10373223	MILI_PSEUDOPODIA_CHEMOTAXIS_DN	1	0
Lrrc8c	10523766	MILI_PSEUDOPODIA_CHEMOTAXIS_DN	1	0
Ly6e	10424676	MILI_PSEUDOPODIA_CHEMOTAXIS_DN	1	0
Malat1	10465244	MILI_PSEUDOPODIA_CHEMOTAXIS_DN	1	0
Mfsd11	10382852	MILI_PSEUDOPODIA_CHEMOTAXIS_DN	1	0
Mmp14	10415052	MILI_PSEUDOPODIA_CHEMOTAXIS_DN	1	0
Mpzl1	10359754	MILI_PSEUDOPODIA_CHEMOTAXIS_DN	1	0
Msn	10600836	HUANG_DASATINIB_RESISTANCE_UP	1	0
Myadm	10569707	GOTZMANN_EPITHELIAL_TO_MESENCHYMAL_TRANSITION_UP	1	1
Myo10	10423293	HUANG_DASATINIB_RESISTANCE_UP	1	0
Nisch	10418578	MILI_PSEUDOPODIA_CHEMOTAXIS_DN	1	0
Nono	10601164	MILI_PSEUDOPODIA_CHEMOTAXIS_DN	1	0
Notch2	10494595	REACTOME_NOTCH_HLH_TRANSCRIPTION_PATHWAY	1	0
Nr2f1	10410766	GOTZMANN_EPITHELIAL_TO_MESENCHYMAL_TRANSITION_UP	1	0
Parva	10556426	HUANG_DASATINIB_RESISTANCE_UP	1	0
Pdgfc	10492689	HUANG_DASATINIB_RESISTANCE_UP	1	0
Pdgfrb	10456046	MILI_PSEUDOPODIA_CHEMOTAXIS_DN	1	0
Perp	10361887	CROMER_METASTASIS_DN	1	1
Plxnb2	10431424	MILI_PSEUDOPODIA_CHEMOTAXIS_DN	1	0
Postn	10492021	GOTZMANN_EPITHELIAL_TO_MESENCHYMAL_TRANSITION_UP	1	1
Prep	10362941	BOGNI_TREATMENT_RELATED_MYELOID_LEUKEMIA_DN	1	0
Psap	10338504, 10339787, 10338673, 10339447, 10341115, 10338585, 10340025, 10342261, 10340177, 10342170, 10344011, 10344141, 10363430, 10343739, 10339936, 10338472, 10341637, 10344017	MILI_PSEUDOPODIA_CHEMOTAXIS_DN	1	0
Rela	10460631	BIOCARTA_CERAMIDE_PATHWAY, PID_CERAMIDE_PATHWAY	1	0
Rpl41	10416915, 10368928, 10591867, 10412098, 10373448	MILI_PSEUDOPODIA_CHEMOTAXIS_DN	1	0
Rtp4	10434778	MOSERLE_IFNA_RESPONSE	1	0
S100a10	10493995	MILI_PSEUDOPODIA_CHEMOTAXIS_DN	1	0
S100a11	10457640, 10493990	CROMER_METASTASIS_DN	1	0
Sdc4	10489484	CROMER_METASTASIS_DN	1	0
Sec31a	10531675	MILI_PSEUDOPODIA_CHEMOTAXIS_DN	1	1
Sec61a1	10546113	MILI_PSEUDOPODIA_CHEMOTAXIS_DN	1	0
Serinc1	10369210	MILI_PSEUDOPODIA_CHEMOTAXIS_DN	1	0
Sgpl1	10369413	MILI_PSEUDOPODIA_CHEMOTAXIS_DN	1	0
Sigmar1	10512308	MILI_PSEUDOPODIA_CHEMOTAXIS_DN	1	0
Slc29a1	10451123	MILI_PSEUDOPODIA_CHEMOTAXIS_DN	1	0
Slc2a1	10507594	MILI_PSEUDOPODIA_CHEMOTAXIS_DN	1	0
Slc38a2	10431894	MILI_PSEUDOPODIA_CHEMOTAXIS_DN	1	0
Slc39a14	10421309	MILI_PSEUDOPODIA_CHEMOTAXIS_DN	1	0
Slc44a2	10583586	MILI_PSEUDOPODIA_CHEMOTAXIS_DN	1	0
Slco2a1	10588263	MILI_PSEUDOPODIA_CHEMOTAXIS_DN	1	0
Sparc	10386058	GOTZMANN_EPITHELIAL_TO_MESENCHYMAL_TRANSITION_UP	1	1
Sppl2a	10487321	MILI_PSEUDOPODIA_CHEMOTAXIS_DN	1	0
Stat3	10391301	PID_CERAMIDE_PATHWAY	1	1
Stt3a	10592217	MILI_PSEUDOPODIA_CHEMOTAXIS_DN	1	0
Tacstd2	10545168	CROMER_METASTASIS_DN	1	1
Tbl3	10341135, 10448700, 10342655, 10338231, 10343841, 10338348, 10340581, 10338144, 10338374, 10339802, 10340821, 10342612, 10340492, 10342629, 10448707, 10339237, 10338615, 10339957, 10340853, 10343788, 10338644, 10338761, 10343018, 10338371, 10338519, 10344027, 10338408, 10344206, 10340519, 10343878	INGA_TP53_TARGETS	1	1
Tcf25	10576305	MILI_PSEUDOPODIA_CHEMOTAXIS_DN	1	0
Tgfb3	10401673	GOTZMANN_EPITHELIAL_TO_MESENCHYMAL_TRANSITION_UP	1	0
Thbs1	10474700	INGA_TP53_TARGETS, MILI_PSEUDOPODIA_CHEMOTAXIS_DN	1	0
Timp2	10393559	MILI_PSEUDOPODIA_CHEMOTAXIS_DN	1	0
Timp3	10365482	GOTZMANN_EPITHELIAL_TO_MESENCHYMAL_TRANSITION_UP, MILI_PSEUDOPODIA_CHEMOTAXIS_DN	1	0
Tmed7	10458823, 10458816	MILI_PSEUDOPODIA_CHEMOTAXIS_DN	1	0
Trps1	10428536, 10428534	MILI_PSEUDOPODIA_CHEMOTAXIS_DN	1	0
Usp22	10386636	FLECHNER_BIOPSY_KIDNEY_TRANSPLANT_OK_VS_DONOR_DN	1	0
Vamp8	10545409	KEGG_SNARE_INTERACTIONS_IN_VESICULAR_TRANSPORT	1	0
Vdac3	10577534, 10407926, 10407921	CROMER_METASTASIS_DN	1	0
Vdr	10432032	LANDIS_BREAST_CANCER_PROGRESSION_UP	1	0
Wfdc18	10379731	LANDIS_BREAST_CANCER_PROGRESSION_UP	1	1
Wls	10497149	MILI_PSEUDOPODIA_CHEMOTAXIS_DN	1	0
Zmiz1	10413220, 10413185	MILI_PSEUDOPODIA_CHEMOTAXIS_DN	1	0
Zyx	10537770	HUANG_DASATINIB_RESISTANCE_UP	1	0
0610031j06rik			0	1
1600029d21rik			0	1
5033411d12rik			0	1
A2m	10541354	FLECHNER_BIOPSY_KIDNEY_TRANSPLANT_OK_VS_DONOR_DN	0	1
Abca2	10470050	MILI_PSEUDOPODIA_CHEMOTAXIS_DN	0	0
Abca3	10442396	MILI_PSEUDOPODIA_CHEMOTAXIS_DN	0	0
Abca7	10364601	MILI_PSEUDOPODIA_CHEMOTAXIS_DN	0	0
Abcc1	10433735	MILI_PSEUDOPODIA_CHEMOTAXIS_DN	0	0
Abcc10	10451261	MILI_PSEUDOPODIA_CHEMOTAXIS_DN	0	0
Abcc5	10438478	MILI_PSEUDOPODIA_CHEMOTAXIS_DN	0	0
Abhd12	10488507	MILI_PSEUDOPODIA_CHEMOTAXIS_DN	0	0
Abi2	10346764	KEGG_SNARE_INTERACTIONS_IN_VESICULAR_TRANSPORT	0	1
Acaa2	10456699	MOOTHA_FFA_OXYDATION	0	0
Acad12	10533360	MOOTHA_FFA_OXYDATION	0	1
Acadm	10502951	MOOTHA_FFA_OXYDATION	0	0
Acads	10532926	MOOTHA_FFA_OXYDATION	0	0
Acadsb	10558227	MOOTHA_FFA_OXYDATION	0	0
Acadvl	10387768	MOOTHA_FFA_OXYDATION	0	0
Acat1	10593591	MOOTHA_FFA_OXYDATION	0	0
Acly	10391146	MILI_PSEUDOPODIA_CHEMOTAXIS_DN	0	0
Acsl1	10571657	MOOTHA_FFA_OXYDATION	0	0
Acsl4	10607089	LANDIS_BREAST_CANCER_PROGRESSION_UP	0	0
Acta1	10582592	CROMER_METASTASIS_DN	0	0
Actl6a	10491385	MILI_PSEUDOPODIA_CHEMOTAXIS_DN	0	0
Acvr1	10482824	MILI_PSEUDOPODIA_CHEMOTAXIS_DN	0	0
Adamts5	10440534	MILI_PSEUDOPODIA_CHEMOTAXIS_DN	0	0
Adamtsl4	10500183	MILI_PSEUDOPODIA_CHEMOTAXIS_DN	0	0
Adar	10493565	MILI_PSEUDOPODIA_CHEMOTAXIS_DN	0	0
Adarb1	10370303	NIKOLSKY_BREAST_CANCER_21Q22_AMPLICON	0	0
Adnp2	10459912	MILI_PSEUDOPODIA_CHEMOTAXIS_DN	0	0
Adora2b	10376832	MILI_PSEUDOPODIA_CHEMOTAXIS_DN	0	0
Adrb2	10459288	MILI_PSEUDOPODIA_CHEMOTAXIS_DN	0	0
Afg3l2	10459534	CROMER_METASTASIS_DN	0	0
Agfg2	10534889	MILI_PSEUDOPODIA_CHEMOTAXIS_DN	0	0
Agps	10473024	HUANG_DASATINIB_RESISTANCE_UP	0	0
Aifm1	10604405	BIOCARTA_CERAMIDE_PATHWAY, PID_CERAMIDE_PATHWAY	0	0
Aimp1	10502232	KEGG_SNARE_INTERACTIONS_IN_VESICULAR_TRANSPORT	0	1
Akap1	10389701	MILI_PSEUDOPODIA_CHEMOTAXIS_DN	0	0
Akap9	10519420	NIKOLSKY_BREAST_CANCER_21Q22_AMPLICON	0	1
Akr1b10	10537157	MILI_PSEUDOPODIA_CHEMOTAXIS_DN	0	0
Akt1	10402766	PID_CERAMIDE_PATHWAY	0	0
Aldh4a1	10509790	CROMER_METASTASIS_DN	0	0
Aldoa	10568050	CROMER_METASTASIS_DN	0	0
Aldoc	10379153	LANDIS_BREAST_CANCER_PROGRESSION_UP	0	0
Alg1	10433389	MILI_PSEUDOPODIA_CHEMOTAXIS_DN	0	0
Amacr	10423090	MOOTHA_FFA_OXYDATION	0	0
Ankrd11	10582445, 10582458	MILI_PSEUDOPODIA_CHEMOTAXIS_DN	0	0
Anxa1	10466606	HUANG_DASATINIB_RESISTANCE_UP	0	0
Anxa7	10417869	MILI_PSEUDOPODIA_CHEMOTAXIS_DN	0	0
Ap1b1	10373986	FLECHNER_BIOPSY_KIDNEY_TRANSPLANT_OK_VS_DONOR_DN	0	0
Ap2a2	10558971	MILI_PSEUDOPODIA_CHEMOTAXIS_DN	0	0
Apaf1	10371846	SA_PROGRAMMED_CELL_DEATH	0	0
Apbb2	10530287	FLECHNER_BIOPSY_KIDNEY_TRANSPLANT_OK_VS_DONOR_DN	0	1
Apex1	10414522	KEGG_BASE_EXCISION_REPAIR	0	0
Apex2	10607250	KEGG_BASE_EXCISION_REPAIR	0	0
Aph1a	10359428, 10494312	REACTOME_NOTCH_HLH_TRANSCRIPTION_PATHWAY	0	1
Aplf	10546031	KEGG_BASE_EXCISION_REPAIR	0	1
Aplp2	10592023	MILI_PSEUDOPODIA_CHEMOTAXIS_DN	0	0
Aptx	10512098	KEGG_BASE_EXCISION_REPAIR	0	1
Aqp1	10538459	MILI_PSEUDOPODIA_CHEMOTAXIS_DN	0	0
Arfgap3	10430974	MILI_PSEUDOPODIA_CHEMOTAXIS_DN, LANDIS_BREAST_CANCER_PROGRESSION_UP	0	1
Arhgap17	10567702	MILI_PSEUDOPODIA_CHEMOTAXIS_DN	0	0
Arhgap29	10495685	HUANG_DASATINIB_RESISTANCE_UP	0	0
Arhgef5	10537834, 10537849	LANDIS_BREAST_CANCER_PROGRESSION_UP	0	1
Armc9	10348032	MILI_PSEUDOPODIA_CHEMOTAXIS_DN	0	0
Atat1	10450622	MILI_PSEUDOPODIA_CHEMOTAXIS_DN	0	0
Atf7	10433034, 10433027, 10433032	INGA_TP53_TARGETS	0	1
Atg5	10341553, 10339889, 10342567, 10362922, 10343908, 10343205, 10340291, 10342288, 10339127, 10338984, 10344127, 10339247, 10338565	BIOCARTA_CERAMIDE_PATHWAY	0	1
Atox1	10386070, 10338150, 10340163, 10344518, 10343439, 10340537	MILI_PSEUDOPODIA_CHEMOTAXIS_DN	0	0
Atp10a	10553788	MILI_PSEUDOPODIA_CHEMOTAXIS_DN	0	0
Atp13a1	10572180	MILI_PSEUDOPODIA_CHEMOTAXIS_DN	0	0
Atp5a1	10456891	CROMER_METASTASIS_DN	0	0
Atrn	10476207, 10601612	MILI_PSEUDOPODIA_CHEMOTAXIS_DN	0	0
Azi1			0	1
B3gat3	10461305	MILI_PSEUDOPODIA_CHEMOTAXIS_DN	0	0
Bad	10461017	BIOCARTA_CERAMIDE_PATHWAY, SA_PROGRAMMED_CELL_DEATH, PID_CERAMIDE_PATHWAY	0	0
Bag4	10577858	PID_CERAMIDE_PATHWAY	0	0
Baiap2	10383289	CROMER_METASTASIS_DN, MILI_PSEUDOPODIA_CHEMOTAXIS_DN	0	0
Bak1	10449303	SA_PROGRAMMED_CELL_DEATH	0	0
Bax	10563303	BIOCARTA_CERAMIDE_PATHWAY, INGA_TP53_TARGETS, SA_PROGRAMMED_CELL_DEATH, FLECHNER_BIOPSY_KIDNEY_TRANSPLANT_OK_VS_DONOR_DN, PID_CERAMIDE_PATHWAY	0	0
Bbc3	10550290	INGA_TP53_TARGETS	0	0
Bcap31	10605081	MILI_PSEUDOPODIA_CHEMOTAXIS_DN	0	0
Bcl10	10496737	SA_PROGRAMMED_CELL_DEATH	0	0
Bcl2	10357043	BIOCARTA_CERAMIDE_PATHWAY, SA_PROGRAMMED_CELL_DEATH, PID_CERAMIDE_PATHWAY	0	0
Bcl2a1a	10587690, 10595633, 10587683	PID_CERAMIDE_PATHWAY	0	1
Bcl2l1	10488655	SA_PROGRAMMED_CELL_DEATH	0	0
Bcl2l10	10587208	SA_PROGRAMMED_CELL_DEATH	0	1
Bcl2l11	10475866	SA_PROGRAMMED_CELL_DEATH	0	0
Bcl2l14	10542287	SA_PROGRAMMED_CELL_DEATH	0	1
Bcl2l2	10415111	PID_CERAMIDE_PATHWAY	0	1
Bcl9	10500434	MILI_PSEUDOPODIA_CHEMOTAXIS_DN	0	0
Bclaf1	10361979	MILI_PSEUDOPODIA_CHEMOTAXIS_DN	0	0
Bet1	10542959	KEGG_SNARE_INTERACTIONS_IN_VESICULAR_TRANSPORT	0	0
Bet1l	10568988	KEGG_SNARE_INTERACTIONS_IN_VESICULAR_TRANSPORT	0	0
Bid	10547531	SA_PROGRAMMED_CELL_DEATH, PID_CERAMIDE_PATHWAY	0	0
Bik	10425801	SA_PROGRAMMED_CELL_DEATH	0	1
Birc3	10590801	PID_CERAMIDE_PATHWAY	0	0
Blm	10564978	REACTOME_PROCESSIVE_SYNTHESIS_ON_THE_LAGGING_STRAND	0	1
Blmh	10378802	FLECHNER_BIOPSY_KIDNEY_TRANSPLANT_OK_VS_DONOR_DN	0	0
Bmf	10486112	SA_PROGRAMMED_CELL_DEATH	0	1
Bnc1	10565204	INGA_TP53_TARGETS	0	1
Bnip1	10443039	KEGG_SNARE_INTERACTIONS_IN_VESICULAR_TRANSPORT	0	0
Bok	10348858	SA_PROGRAMMED_CELL_DEATH	0	1
Bop1	10429908	MILI_PSEUDOPODIA_CHEMOTAXIS_DN	0	0
Braf	10544219	PID_CERAMIDE_PATHWAY	0	1
Brap	10525296	PID_CERAMIDE_PATHWAY	0	1
Brca1	10391461	GOTZMANN_EPITHELIAL_TO_MESENCHYMAL_TRANSITION_UP	0	0
Brd2	10450126	FLECHNER_BIOPSY_KIDNEY_TRANSPLANT_OK_VS_DONOR_DN	0	0
Brms1	10460517	MILI_PSEUDOPODIA_CHEMOTAXIS_DN	0	0
Btg1	10365971	MILI_PSEUDOPODIA_CHEMOTAXIS_DN	0	0
C1galt1c1	10604226	MILI_PSEUDOPODIA_CHEMOTAXIS_DN	0	0
C1ql1	10391828	FLECHNER_BIOPSY_KIDNEY_TRANSPLANT_OK_VS_DONOR_DN	0	0
C330027c09rik	10436106	GOTZMANN_EPITHELIAL_TO_MESENCHYMAL_TRANSITION_UP	0	1
Cadm4	10550915	FLECHNER_BIOPSY_KIDNEY_TRANSPLANT_OK_VS_DONOR_DN	0	0
Calu	10536818	MILI_PSEUDOPODIA_CHEMOTAXIS_DN	0	0
Cand2	10540935	CROMER_METASTASIS_DN	0	1
Card10	10430400	CROMER_METASTASIS_DN	0	0
Card11	10535282	SA_PROGRAMMED_CELL_DEATH	0	1
Casp2	10537728	PID_CERAMIDE_PATHWAY	0	1
Casp3	10571696	INGA_TP53_TARGETS	0	1
Casp8ap2	10503711	SA_PROGRAMMED_CELL_DEATH	0	0
Casp9	10510034	SA_PROGRAMMED_CELL_DEATH	0	0
Cav1	10536499	CROMER_METASTASIS_DN, HUANG_DASATINIB_RESISTANCE_UP	0	0
Cav2	10536494	CROMER_METASTASIS_DN, HUANG_DASATINIB_RESISTANCE_UP	0	0
Ccdc50	10434869	HUANG_DASATINIB_RESISTANCE_UP	0	0
Ccl2	10379511	GOTZMANN_EPITHELIAL_TO_MESENCHYMAL_TRANSITION_UP	0	0
Ccl7	10379518	GOTZMANN_EPITHELIAL_TO_MESENCHYMAL_TRANSITION_UP	0	0
Ccna2	10497831	GOTZMANN_EPITHELIAL_TO_MESENCHYMAL_TRANSITION_UP	0	1
Ccnd1	10569646	BOGNI_TREATMENT_RELATED_MYELOID_LEUKEMIA_DN	0	0
Ccnd2	10548105	INGA_TP53_TARGETS	0	1
Ccng2	10523297	BOGNI_TREATMENT_RELATED_MYELOID_LEUKEMIA_DN	0	0
Ccnt2	10349442	MILI_PSEUDOPODIA_CHEMOTAXIS_DN	0	0
Ccny	10457385	MILI_PSEUDOPODIA_CHEMOTAXIS_DN	0	0
Cd109	10587383	MILI_PSEUDOPODIA_CHEMOTAXIS_DN	0	0
Cd274	10462390	MOSERLE_IFNA_RESPONSE	0	0
Cd2ap	10451004	BOGNI_TREATMENT_RELATED_MYELOID_LEUKEMIA_DN	0	0
Cd82	10485213	LANDIS_BREAST_CANCER_PROGRESSION_UP	0	0
Cd9	10548030	MILI_PSEUDOPODIA_CHEMOTAXIS_DN	0	0
Cdc42ep3	10453049	HUANG_DASATINIB_RESISTANCE_UP	0	0
Cdcp1	10597935	LANDIS_BREAST_CANCER_PROGRESSION_UP	0	1
Cdh2	10457644	GOTZMANN_EPITHELIAL_TO_MESENCHYMAL_TRANSITION_UP, BOGNI_TREATMENT_RELATED_MYELOID_LEUKEMIA_DN	0	0
Cdk1	10369815	REACTOME_SOS_MEDIATED_SIGNALLING	0	0
Cdk4	10366814	BOGNI_TREATMENT_RELATED_MYELOID_LEUKEMIA_DN	0	1
Cdk8	10527508	BOGNI_TREATMENT_RELATED_MYELOID_LEUKEMIA_DN	0	0
Cdkn1a	10443463	INGA_TP53_TARGETS	0	0
Cds2	10476326	MILI_PSEUDOPODIA_CHEMOTAXIS_DN	0	0
Ceacam1	10561008	LANDIS_BREAST_CANCER_PROGRESSION_UP	0	1
Cebpb	10478890	BIOCARTA_CERAMIDE_PATHWAY	0	1
Cebpz	10453006	CROMER_METASTASIS_DN	0	0
Celsr1	10431229	CROMER_METASTASIS_DN	0	0
Cenpa	10520521	GOTZMANN_EPITHELIAL_TO_MESENCHYMAL_TRANSITION_UP	0	0
Cflar	10346551, 10497931, 10346562	PID_CERAMIDE_PATHWAY	0	1
Chaf1a	10446027	REACTOME_POL_SWITCHING	0	1
Chek1	10592201	GOTZMANN_EPITHELIAL_TO_MESENCHYMAL_TRANSITION_UP	0	0
Chka	10460221	MILI_PSEUDOPODIA_CHEMOTAXIS_DN	0	0
Chmp2b	10440307	LANDIS_BREAST_CANCER_PROGRESSION_UP	0	0
Chpf	10355864	MILI_PSEUDOPODIA_CHEMOTAXIS_DN	0	0
Chpf2	10520234	MILI_PSEUDOPODIA_CHEMOTAXIS_DN	0	0
Chrac1	10424577	KEGG_BASE_EXCISION_REPAIR	0	1
Chrnb1	10387625	GOTZMANN_EPITHELIAL_TO_MESENCHYMAL_TRANSITION_UP	0	0
Chst12	10527009	MILI_PSEUDOPODIA_CHEMOTAXIS_DN	0	0
Chtf18	10448975	REACTOME_POL_SWITCHING	0	1
Chuk	10467921	MILI_PSEUDOPODIA_CHEMOTAXIS_DN	0	0
Ckap4	10371387	MILI_PSEUDOPODIA_CHEMOTAXIS_DN	0	0
Ckb	10402708	CROMER_METASTASIS_DN	0	0
Ckm	10550698	CROMER_METASTASIS_DN	0	1
Clcf1	10460385	MILI_PSEUDOPODIA_CHEMOTAXIS_DN	0	0
Clcn4	10559853	MILI_PSEUDOPODIA_CHEMOTAXIS_DN	0	0
Clcn6	10518428	MILI_PSEUDOPODIA_CHEMOTAXIS_DN	0	0
Clcn7	10442691	MILI_PSEUDOPODIA_CHEMOTAXIS_DN	0	0
Cldn3	10526241	LANDIS_BREAST_CANCER_PROGRESSION_UP	0	0
Cldn7	10377673	LANDIS_BREAST_CANCER_PROGRESSION_UP	0	0
Cldn9	10448312	MILI_PSEUDOPODIA_CHEMOTAXIS_DN	0	0
Clic1	10444658	MILI_PSEUDOPODIA_CHEMOTAXIS_DN	0	0
Clip2	10534281	KEGG_SNARE_INTERACTIONS_IN_VESICULAR_TRANSPORT	0	1
Clstn1	10510482	MILI_PSEUDOPODIA_CHEMOTAXIS_DN, NIKOLSKY_BREAST_CANCER_21Q22_AMPLICON	0	1
Clta	10504458	MILI_PSEUDOPODIA_CHEMOTAXIS_DN	0	0
Clu	10416057	GOTZMANN_EPITHELIAL_TO_MESENCHYMAL_TRANSITION_UP	0	0
Clybl	10417167	MOOTHA_FFA_OXYDATION	0	1
Cmas	10542665	LANDIS_BREAST_CANCER_PROGRESSION_UP	0	0
Cmpk2	10395039	MOSERLE_IFNA_RESPONSE	0	0
Cnnm2	10463716	MILI_PSEUDOPODIA_CHEMOTAXIS_DN	0	0
Cnot3	10549569	MILI_PSEUDOPODIA_CHEMOTAXIS_DN	0	0
Cnot6	10385557	REACTOME_POL_SWITCHING	0	1
Cnot8	10376314	REACTOME_POL_SWITCHING	0	1
Cntn1	10426397	REACTOME_NOTCH_HLH_TRANSCRIPTION_PATHWAY	0	1
Col16a1	10508533	MILI_PSEUDOPODIA_CHEMOTAXIS_DN	0	0
Col17a1	10468344	CROMER_METASTASIS_DN	0	0
Col18a1	10370259	GOTZMANN_EPITHELIAL_TO_MESENCHYMAL_TRANSITION_UP, NIKOLSKY_BREAST_CANCER_21Q22_AMPLICON	0	0
Col1a1	10380419	GOTZMANN_EPITHELIAL_TO_MESENCHYMAL_TRANSITION_UP	0	0
Col1a2	10536220	GOTZMANN_EPITHELIAL_TO_MESENCHYMAL_TRANSITION_UP	0	1
Col3a1	10346015	GOTZMANN_EPITHELIAL_TO_MESENCHYMAL_TRANSITION_UP	0	0
Col4a1	10576973	GOTZMANN_EPITHELIAL_TO_MESENCHYMAL_TRANSITION_UP, MILI_PSEUDOPODIA_CHEMOTAXIS_DN	0	0
Col4a2	10570068	GOTZMANN_EPITHELIAL_TO_MESENCHYMAL_TRANSITION_UP, MILI_PSEUDOPODIA_CHEMOTAXIS_DN	0	1
Col4a5	10602105	MILI_PSEUDOPODIA_CHEMOTAXIS_DN	0	0
Col4a6	10607012	MILI_PSEUDOPODIA_CHEMOTAXIS_DN	0	0
Col5a1	10470462	HUANG_DASATINIB_RESISTANCE_UP, MILI_PSEUDOPODIA_CHEMOTAXIS_DN	0	0
Col5a2	10354309	GOTZMANN_EPITHELIAL_TO_MESENCHYMAL_TRANSITION_UP	0	0
Col6a1	10370210	NIKOLSKY_BREAST_CANCER_21Q22_AMPLICON	0	0
Col6a2	10370180	NIKOLSKY_BREAST_CANCER_21Q22_AMPLICON, MILI_PSEUDOPODIA_CHEMOTAXIS_DN	0	1
Col6a3	10356520	NIKOLSKY_BREAST_CANCER_21Q22_AMPLICON	0	1
Cotl1	10582162	HUANG_DASATINIB_RESISTANCE_UP	0	0
Cpt2	10514933	MOOTHA_FFA_OXYDATION	0	0
Cradd	10372060	PID_CERAMIDE_PATHWAY	0	0
Crat	10481474	MOOTHA_FFA_OXYDATION	0	0
Crb3	10446224	LANDIS_BREAST_CANCER_PROGRESSION_UP	0	1
Creb3l4	10499751	BOGNI_TREATMENT_RELATED_MYELOID_LEUKEMIA_DN	0	1
Crtap	10597413	MILI_PSEUDOPODIA_CHEMOTAXIS_DN	0	1
Csf1	10501164	GOTZMANN_EPITHELIAL_TO_MESENCHYMAL_TRANSITION_UP	0	0
Cspg4	10585588	MILI_PSEUDOPODIA_CHEMOTAXIS_DN	0	0
Ctnna1	10454786	MILI_PSEUDOPODIA_CHEMOTAXIS_DN	0	0
Ctsa	10478594	MILI_PSEUDOPODIA_CHEMOTAXIS_DN	0	1
Ctsb	10415844	MILI_PSEUDOPODIA_CHEMOTAXIS_DN	0	0
Cul1	10537882	CROMER_METASTASIS_DN	0	0
Cux1	10534596	MILI_PSEUDOPODIA_CHEMOTAXIS_DN	0	0
Cxcl10	10531415	MOSERLE_IFNA_RESPONSE	0	0
Cxxc1	10456601	FLECHNER_BIOPSY_KIDNEY_TRANSPLANT_OK_VS_DONOR_DN	0	1
Cyb561	10392056	LANDIS_BREAST_CANCER_PROGRESSION_UP	0	0
Cyb5r3	10430956	HUANG_DASATINIB_RESISTANCE_UP	0	1
Cycs	10462136, 10544687, 10528170	BIOCARTA_CERAMIDE_PATHWAY, PID_CERAMIDE_PATHWAY	0	0
Cyr61	10502655	MILI_PSEUDOPODIA_CHEMOTAXIS_DN	0	1
D2hgdh	10348889	MOOTHA_FFA_OXYDATION	0	1
Dbt	10495549	MOOTHA_FFA_OXYDATION	0	1
Dcbld1	10363118	MILI_PSEUDOPODIA_CHEMOTAXIS_DN	0	0
Dcbld2	10436372	HUANG_DASATINIB_RESISTANCE_UP	0	0
Dcc	10459671	FLECHNER_BIOPSY_KIDNEY_TRANSPLANT_OK_VS_DONOR_DN	0	1
Dck	10523012	GOTZMANN_EPITHELIAL_TO_MESENCHYMAL_TRANSITION_UP	0	0
Dctn2	10366866	INGA_TP53_TARGETS	0	1
Ddb2	10484999	CROMER_METASTASIS_DN	0	0
Ddit3	10366881	MILI_PSEUDOPODIA_CHEMOTAXIS_DN	0	0
Ddost	10509542	MILI_PSEUDOPODIA_CHEMOTAXIS_DN	0	0
Ddr1	10450579	BOGNI_TREATMENT_RELATED_MYELOID_LEUKEMIA_DN, MILI_PSEUDOPODIA_CHEMOTAXIS_DN	0	0
Ddx52	10379779	FLECHNER_BIOPSY_KIDNEY_TRANSPLANT_OK_VS_DONOR_DN	0	1
Ddx60	10571984	MOSERLE_IFNA_RESPONSE	0	0
Decr1	10511679	MOOTHA_FFA_OXYDATION	0	0
Degs1	10360789	MILI_PSEUDOPODIA_CHEMOTAXIS_DN	0	0
Dgat1	10429926	MILI_PSEUDOPODIA_CHEMOTAXIS_DN	0	0
Dgcr2	10438232	MILI_PSEUDOPODIA_CHEMOTAXIS_DN	0	0
Dgkz	10485081, 10485070, 10485115	MILI_PSEUDOPODIA_CHEMOTAXIS_DN	0	0
Dhcr24	10506571	INGA_TP53_TARGETS	0	1
Dhrs7	10400941	MILI_PSEUDOPODIA_CHEMOTAXIS_DN	0	0
Dhx30	10597103	MILI_PSEUDOPODIA_CHEMOTAXIS_DN	0	0
Dhx58	10391207	MOSERLE_IFNA_RESPONSE	0	1
Diaph1	10458430	MILI_PSEUDOPODIA_CHEMOTAXIS_DN	0	0
Dido1	10490510	MILI_PSEUDOPODIA_CHEMOTAXIS_DN	0	0
Dip2a	10370089	NIKOLSKY_BREAST_CANCER_21Q22_AMPLICON	0	0
Dll1	10448034	REACTOME_NOTCH_HLH_TRANSCRIPTION_PATHWAY	0	1
Dll4	10474958	REACTOME_NOTCH_HLH_TRANSCRIPTION_PATHWAY	0	1
Dna2	10363575	REACTOME_PROCESSIVE_SYNTHESIS_ON_THE_LAGGING_STRAND	0	0
Dnaja2	10580370	MILI_PSEUDOPODIA_CHEMOTAXIS_DN	0	0
Dnajc1	10480329	FLECHNER_BIOPSY_KIDNEY_TRANSPLANT_OK_VS_DONOR_DN	0	1
Dnm1	10481592	CROMER_METASTASIS_DN	0	1
Dnm1l	10437992	SA_PROGRAMMED_CELL_DEATH	0	1
Dntt	10463123	KEGG_BASE_EXCISION_REPAIR	0	1
Dnttip1	10478560	MILI_PSEUDOPODIA_CHEMOTAXIS_DN	0	0
Dolk	10481453	MILI_PSEUDOPODIA_CHEMOTAXIS_DN	0	0
Dpf2	10465263	MILI_PSEUDOPODIA_CHEMOTAXIS_DN	0	0
Dpyd	10495625	HUANG_DASATINIB_RESISTANCE_UP	0	0
Dr1	10523955	KEGG_BASE_EXCISION_REPAIR	0	1
Dsc1	10457707	CROMER_METASTASIS_DN	0	1
Dsg2	10454172	LANDIS_BREAST_CANCER_PROGRESSION_UP	0	0
Dsp	10404649	CROMER_METASTASIS_DN	0	1
Dtx2	10526427	CROMER_METASTASIS_DN	0	0
Dtx3	10373093	CROMER_METASTASIS_DN	0	1
Dusp1	10449284	MILI_PSEUDOPODIA_CHEMOTAXIS_DN	0	0
Dusp10	10352448	HUANG_DASATINIB_RESISTANCE_UP	0	0
Dusp6	10366043	BIOCARTA_CERAMIDE_PATHWAY	0	1
Dusp7	10588495	CROMER_METASTASIS_DN	0	0
Dynll1	10532984, 10608684	CROMER_METASTASIS_DN	0	1
Dzip1	10422321, 10417004	MILI_PSEUDOPODIA_CHEMOTAXIS_DN	0	0
Ebp	10603485	LANDIS_BREAST_CANCER_PROGRESSION_UP	0	0
Ech1	10551614	MOOTHA_FFA_OXYDATION	0	1
Echs1	10568939	MOOTHA_FFA_OXYDATION	0	0
Eci1	10442445	MOOTHA_FFA_OXYDATION	0	0
Eci2	10408656	MOOTHA_FFA_OXYDATION	0	1
Ect2	10497520	GOTZMANN_EPITHELIAL_TO_MESENCHYMAL_TRANSITION_UP	0	1
Edem2	10488912	MILI_PSEUDOPODIA_CHEMOTAXIS_DN	0	0
Edn1	10404783	GOTZMANN_EPITHELIAL_TO_MESENCHYMAL_TRANSITION_UP	0	0
Egf	10502105	PID_CERAMIDE_PATHWAY	0	0
Egfl7	10470283, 10470296	REACTOME_NOTCH_HLH_TRANSCRIPTION_PATHWAY	0	1
Egfr	10374366	HUANG_DASATINIB_RESISTANCE_UP	0	0
Ehf	10485445	LANDIS_BREAST_CANCER_PROGRESSION_UP	0	0
Eif2a	10492205	PID_CERAMIDE_PATHWAY	0	0
Eif2ak2	10452978, 10452980	FLECHNER_BIOPSY_KIDNEY_TRANSPLANT_OK_VS_DONOR_DN, PID_CERAMIDE_PATHWAY	0	0
Eif2ak3	10538939	MILI_PSEUDOPODIA_CHEMOTAXIS_DN	0	0
Eif3k	10561552	CROMER_METASTASIS_DN	0	0
Elk3	10371959	HUANG_DASATINIB_RESISTANCE_UP	0	0
Ell2	10406254	LANDIS_BREAST_CANCER_PROGRESSION_UP, HUANG_DASATINIB_RESISTANCE_UP	0	0
Eln	10534343	GOTZMANN_EPITHELIAL_TO_MESENCHYMAL_TRANSITION_UP	0	1
Elovl1	10507539	MILI_PSEUDOPODIA_CHEMOTAXIS_DN	0	0
Emilin1	10520604	MILI_PSEUDOPODIA_CHEMOTAXIS_DN	0	0
Eml1	10398240	CROMER_METASTASIS_DN	0	1
Enoph1	10523518	REACTOME_POL_SWITCHING	0	1
Eny2	10423963	NIKOLSKY_BREAST_CANCER_21Q22_AMPLICON	0	1
Epas1	10447317	CROMER_METASTASIS_DN	0	0
Epb41l2	10362245	MILI_PSEUDOPODIA_CHEMOTAXIS_DN	0	0
Epha2	10509965	HUANG_DASATINIB_RESISTANCE_UP	0	0
Ephb2	10517488	HUANG_DASATINIB_RESISTANCE_UP	0	0
Ephb4	10526566	MILI_PSEUDOPODIA_CHEMOTAXIS_DN	0	0
Epsti1	10416566	MOSERLE_IFNA_RESPONSE	0	0
Eral1	10388734	MILI_PSEUDOPODIA_CHEMOTAXIS_DN	0	0
Erbb3	10373467	LANDIS_BREAST_CANCER_PROGRESSION_UP	0	1
Ercc5	10345981	KEGG_BASE_EXCISION_REPAIR	0	1
Ero1l	10419198	MILI_PSEUDOPODIA_CHEMOTAXIS_DN	0	0
Errfi1	10510574	INGA_TP53_TARGETS	0	1
Esd	10417273, 10416411	MILI_PSEUDOPODIA_CHEMOTAXIS_DN	0	0
Esrp1	10511560	LANDIS_BREAST_CANCER_PROGRESSION_UP	0	1
Etfa	10593789	MOOTHA_FFA_OXYDATION	0	1
Etfb	10552418	MOOTHA_FFA_OXYDATION	0	1
Etfdh	10498837	MOOTHA_FFA_OXYDATION	0	1
Evpl	10393197	CROMER_METASTASIS_DN	0	0
Exo1	10352048	KEGG_BASE_EXCISION_REPAIR	0	1
Exoc1	10522606	BOGNI_TREATMENT_RELATED_MYELOID_LEUKEMIA_DN	0	1
Exoc5	10419370	KEGG_SNARE_INTERACTIONS_IN_VESICULAR_TRANSPORT	0	1
Ext1	10428579	HUANG_DASATINIB_RESISTANCE_UP	0	0
F2rl1	10411226	HUANG_DASATINIB_RESISTANCE_UP	0	0
F3	10495675	HUANG_DASATINIB_RESISTANCE_UP, MILI_PSEUDOPODIA_CHEMOTAXIS_DN	0	0
Fadd	10569611	BIOCARTA_CERAMIDE_PATHWAY, PID_CERAMIDE_PATHWAY	0	0
Fam134b	10423333	LANDIS_BREAST_CANCER_PROGRESSION_UP	0	0
Fam171a1	10468916	MILI_PSEUDOPODIA_CHEMOTAXIS_DN	0	0
Fam53b	10568586	MILI_PSEUDOPODIA_CHEMOTAXIS_DN	0	0
Fam96b	10581159	REACTOME_PROCESSIVE_SYNTHESIS_ON_THE_LAGGING_STRAND	0	1
Fas	10462603	PID_CERAMIDE_PATHWAY	0	1
Fbn1	10487040	GOTZMANN_EPITHELIAL_TO_MESENCHYMAL_TRANSITION_UP	0	1
Fbxo21	10524941	BOGNI_TREATMENT_RELATED_MYELOID_LEUKEMIA_DN	0	0
Fen1	10465912	REACTOME_PROCESSIVE_SYNTHESIS_ON_THE_LAGGING_STRAND, KEGG_BASE_EXCISION_REPAIR	0	0
Fgf7	10475643	MILI_PSEUDOPODIA_CHEMOTAXIS_DN	0	0
Fibp	10460591	MILI_PSEUDOPODIA_CHEMOTAXIS_DN	0	0
Flad1	10499620	CROMER_METASTASIS_DN	0	0
Flot2	10379013	CROMER_METASTASIS_DN	0	1
Fos	10397346	INGA_TP53_TARGETS, FLECHNER_BIOPSY_KIDNEY_TRANSPLANT_OK_VS_DONOR_DN, MILI_PSEUDOPODIA_CHEMOTAXIS_DN	0	0
Fosb	10560481	MILI_PSEUDOPODIA_CHEMOTAXIS_DN	0	0
Fscn2	10383345	BOGNI_TREATMENT_RELATED_MYELOID_LEUKEMIA_DN	0	0
Fstl1	10435641	HUANG_DASATINIB_RESISTANCE_UP	0	0
Ftcd	10364222	NIKOLSKY_BREAST_CANCER_21Q22_AMPLICON	0	0
Furin	10564960	GOTZMANN_EPITHELIAL_TO_MESENCHYMAL_TRANSITION_UP	0	0
Fus	10557853, 10557843	MILI_PSEUDOPODIA_CHEMOTAXIS_DN	0	0
Fxyd5	10562192	HUANG_DASATINIB_RESISTANCE_UP	0	0
Fzd2	10381603	MILI_PSEUDOPODIA_CHEMOTAXIS_DN	0	0
Fzd7	10346607	MILI_PSEUDOPODIA_CHEMOTAXIS_DN	0	0
Gaa	10383088	MILI_PSEUDOPODIA_CHEMOTAXIS_DN	0	0
Gadd45a	10545130	INGA_TP53_TARGETS	0	0
Gadd45b	10364950	GOTZMANN_EPITHELIAL_TO_MESENCHYMAL_TRANSITION_UP	0	0
Galnt3	10483249	LANDIS_BREAST_CANCER_PROGRESSION_UP	0	0
Gata2	10539873	GOTZMANN_EPITHELIAL_TO_MESENCHYMAL_TRANSITION_UP	0	0
Gbp2	10496592	HUANG_DASATINIB_RESISTANCE_UP	0	1
Gbp3	10496580	HUANG_DASATINIB_RESISTANCE_UP	0	0
Gbp6	10531994	MOSERLE_IFNA_RESPONSE	0	1
Gbp7	10496569	HUANG_DASATINIB_RESISTANCE_UP	0	1
Gcc1	10543524	KEGG_SNARE_INTERACTIONS_IN_VESICULAR_TRANSPORT	0	1
Gcn1l1	10524723	MILI_PSEUDOPODIA_CHEMOTAXIS_DN	0	0
Gem	10503334	NIKOLSKY_BREAST_CANCER_21Q22_AMPLICON	0	1
Gen1	10399391	KEGG_BASE_EXCISION_REPAIR	0	1
Ggcx	10539119	MILI_PSEUDOPODIA_CHEMOTAXIS_DN	0	0
Ggnbp2	10389308	MILI_PSEUDOPODIA_CHEMOTAXIS_DN	0	0
Gjb3	10516484	CROMER_METASTASIS_DN	0	0
Gla	10606714	MILI_PSEUDOPODIA_CHEMOTAXIS_DN	0	0
Glg1	10581772	GOTZMANN_EPITHELIAL_TO_MESENCHYMAL_TRANSITION_UP, MILI_PSEUDOPODIA_CHEMOTAXIS_DN	0	0
Gli3	10403727	REACTOME_NOTCH_HLH_TRANSCRIPTION_PATHWAY	0	1
Gmcl1	10545940	MILI_PSEUDOPODIA_CHEMOTAXIS_DN	0	0
Gmpr2	10415363	MILI_PSEUDOPODIA_CHEMOTAXIS_DN	0	0
Gnb2l1	10375487, 10375501, 10375497, 10375499	MILI_PSEUDOPODIA_CHEMOTAXIS_DN	0	0
Golph3	10423172	LANDIS_BREAST_CANCER_PROGRESSION_UP	0	0
Gosr1	10388579	KEGG_SNARE_INTERACTIONS_IN_VESICULAR_TRANSPORT	0	0
Gosr2	10391949	KEGG_SNARE_INTERACTIONS_IN_VESICULAR_TRANSPORT	0	0
Gpaa1	10424810	FLECHNER_BIOPSY_KIDNEY_TRANSPLANT_OK_VS_DONOR_DN, MILI_PSEUDOPODIA_CHEMOTAXIS_DN	0	0
Gpr108	10452356	MILI_PSEUDOPODIA_CHEMOTAXIS_DN	0	0
Gprc5b	10567355	MILI_PSEUDOPODIA_CHEMOTAXIS_DN	0	0
Grasp	10427026	MILI_PSEUDOPODIA_CHEMOTAXIS_DN	0	0
Grb2	10392990	REACTOME_SOS_MEDIATED_SIGNALLING	0	0
Grlf1			0	1
Gsk3b	10435676	MILI_PSEUDOPODIA_CHEMOTAXIS_DN	0	0
Gspt1	10437748	MILI_PSEUDOPODIA_CHEMOTAXIS_DN	0	0
Gss	10488879	FLECHNER_BIOPSY_KIDNEY_TRANSPLANT_OK_VS_DONOR_DN	0	0
Gstp1	10464586, 10464583, 10361152	CROMER_METASTASIS_DN	0	0
Hadh	10502205	MOOTHA_FFA_OXYDATION	0	0
Hadhb	10474379, 10520467	MOOTHA_FFA_OXYDATION	0	0
Hexa	10585874	MILI_PSEUDOPODIA_CHEMOTAXIS_DN	0	1
Hiatl1	10410173	MILI_PSEUDOPODIA_CHEMOTAXIS_DN	0	0
Hibadh	10544815, 10394731, 10544827	MOOTHA_FFA_OXYDATION	0	1
Hibch	10346235	MOOTHA_FFA_OXYDATION	0	1
Hipk2	10544114	BOGNI_TREATMENT_RELATED_MYELOID_LEUKEMIA_DN	0	1
Hmgcr	10411332	MILI_PSEUDOPODIA_CHEMOTAXIS_DN	0	0
Hmgcs1	10412466	MILI_PSEUDOPODIA_CHEMOTAXIS_DN	0	0
Hras	10569071	REACTOME_SOS_MEDIATED_SIGNALLING	0	0
Hrk	10524969	SA_PROGRAMMED_CELL_DEATH	0	1
Hsd17b10	10602592	MOOTHA_FFA_OXYDATION	0	0
Hsd17b12	10485294	MILI_PSEUDOPODIA_CHEMOTAXIS_DN	0	0
Hsdl2	10505200	MOOTHA_FFA_OXYDATION	0	1
Hsp90b1	10371482	MILI_PSEUDOPODIA_CHEMOTAXIS_DN	0	1
Hspa2	10396652	CROMER_METASTASIS_DN	0	0
Hspg2	10509280	GOTZMANN_EPITHELIAL_TO_MESENCHYMAL_TRANSITION_UP	0	1
Htt	10521261	MILI_PSEUDOPODIA_CHEMOTAXIS_DN	0	0
Id2	10399691	LANDIS_BREAST_CANCER_PROGRESSION_UP	0	0
Ier3	10444890	INGA_TP53_TARGETS	0	0
Ifi44l	10502801	MOSERLE_IFNA_RESPONSE	0	0
Ifi47	10375515	HUANG_DASATINIB_RESISTANCE_UP	0	1
Ifih1	10483110	MOSERLE_IFNA_RESPONSE	0	0
Ifit1	10462623	MOSERLE_IFNA_RESPONSE	0	0
Ifit2	10462613	MOSERLE_IFNA_RESPONSE	0	0
Ifit3	10462618	MOSERLE_IFNA_RESPONSE, HUANG_DASATINIB_RESISTANCE_UP	0	0
Ifitm1	10570434, 10558769	MOSERLE_IFNA_RESPONSE	0	0
Ift57	10436169	KEGG_SNARE_INTERACTIONS_IN_VESICULAR_TRANSPORT	0	1
Igf1	10365559	PID_CERAMIDE_PATHWAY	0	0
Igf1r	10554094	MILI_PSEUDOPODIA_CHEMOTAXIS_DN, REACTOME_SOS_MEDIATED_SIGNALLING	0	1
Igfbp3	10384223	INGA_TP53_TARGETS	0	0
Igsf3	10494781	CROMER_METASTASIS_DN, MILI_PSEUDOPODIA_CHEMOTAXIS_DN	0	0
Igsf8	10351769	MILI_PSEUDOPODIA_CHEMOTAXIS_DN	0	0
Igtp			0	1
Ikbkg	10600453	PID_CERAMIDE_PATHWAY	0	1
Il15	10579958	HUANG_DASATINIB_RESISTANCE_UP	0	1
Il15ra	10469289	HUANG_DASATINIB_RESISTANCE_UP	0	0
Il4ra	10557326	REACTOME_SOS_MEDIATED_SIGNALLING	0	1
Il6st	10407173	MILI_PSEUDOPODIA_CHEMOTAXIS_DN	0	0
Ilf3	10583610	MILI_PSEUDOPODIA_CHEMOTAXIS_DN	0	0
Ilk	10556005	HUANG_DASATINIB_RESISTANCE_UP	0	1
Impa2	10456383	CROMER_METASTASIS_DN	0	0
Impact	10454039	MILI_PSEUDOPODIA_CHEMOTAXIS_DN	0	0
Inhba	10403743	GOTZMANN_EPITHELIAL_TO_MESENCHYMAL_TRANSITION_UP	0	0
Inhbb	10357155	GOTZMANN_EPITHELIAL_TO_MESENCHYMAL_TRANSITION_UP	0	0
Inpp1	10354521	HUANG_DASATINIB_RESISTANCE_UP	0	0
Irf6	10352815	LANDIS_BREAST_CANCER_PROGRESSION_UP	0	0
Irf7	10569102	MOSERLE_IFNA_RESPONSE	0	1
Irgm1	10385500	HUANG_DASATINIB_RESISTANCE_UP	0	1
Irgm2	10376326	HUANG_DASATINIB_RESISTANCE_UP	0	1
Irs1	10356084	REACTOME_SOS_MEDIATED_SIGNALLING	0	0
Irs2	10576971	REACTOME_SOS_MEDIATED_SIGNALLING	0	0
Irx3	10580577	LANDIS_BREAST_CANCER_PROGRESSION_UP	0	0
Isg15	10451287	MOSERLE_IFNA_RESPONSE	0	1
Isg20l2	10493103	CROMER_METASTASIS_DN	0	0
Itga3	10390117	CROMER_METASTASIS_DN, MILI_PSEUDOPODIA_CHEMOTAXIS_DN	0	0
Itga5	10433114	HUANG_DASATINIB_RESISTANCE_UP, MILI_PSEUDOPODIA_CHEMOTAXIS_DN	0	0
Itgb4	10382713	CROMER_METASTASIS_DN	0	0
Ivd	10474836	MOOTHA_FFA_OXYDATION	0	1
Jag1	10488060	HUANG_DASATINIB_RESISTANCE_UP	0	0
Jag2	10402808	REACTOME_NOTCH_HLH_TRANSCRIPTION_PATHWAY	0	1
Jun	10514466	GOTZMANN_EPITHELIAL_TO_MESENCHYMAL_TRANSITION_UP	0	0
Jup	10391103	CROMER_METASTASIS_DN	0	0
Kat2a	10391221	REACTOME_NOTCH_HLH_TRANSCRIPTION_PATHWAY	0	0
Kat2b	10445909	REACTOME_NOTCH_HLH_TRANSCRIPTION_PATHWAY	0	0
Kazn	10518113	CROMER_METASTASIS_DN	0	0
Kcnk3	10520506	REACTOME_SOS_MEDIATED_SIGNALLING	0	1
Kcnn4	10550877	LANDIS_BREAST_CANCER_PROGRESSION_UP, MILI_PSEUDOPODIA_CHEMOTAXIS_DN	0	0
Kctd12	10422059	HUANG_DASATINIB_RESISTANCE_UP	0	0
Kctd13	10557528	REACTOME_POL_SWITCHING	0	1
Kdelc1	10354286	MILI_PSEUDOPODIA_CHEMOTAXIS_DN	0	0
Kdm6b	10387372, 10387368	MILI_PSEUDOPODIA_CHEMOTAXIS_DN	0	0
Klf5	10416777	CROMER_METASTASIS_DN	0	0
Klf6	10403352	MILI_PSEUDOPODIA_CHEMOTAXIS_DN	0	0
Klk10	10552488	CROMER_METASTASIS_DN	0	0
Knop1	10567343	LANDIS_BREAST_CANCER_PROGRESSION_UP	0	1
Kras	10549256	REACTOME_SOS_MEDIATED_SIGNALLING	0	0
Krit1	10519392	MILI_PSEUDOPODIA_CHEMOTAXIS_DN	0	0
Krt14	10391052	CROMER_METASTASIS_DN	0	1
Krt17	10391066	CROMER_METASTASIS_DN	0	1
Krt18	10427075	LANDIS_BREAST_CANCER_PROGRESSION_UP	0	1
Krt6a	10432780	CROMER_METASTASIS_DN	0	1
Krt7	10427052	FLECHNER_BIOPSY_KIDNEY_TRANSPLANT_OK_VS_DONOR_DN	0	0
Krt8	10432918	LANDIS_BREAST_CANCER_PROGRESSION_UP	0	1
Ksr1	10388914	PID_CERAMIDE_PATHWAY	0	0
Lad1	10350159	CROMER_METASTASIS_DN	0	0
Lama3	10453939	CROMER_METASTASIS_DN	0	1
Lamb1	10395163	MILI_PSEUDOPODIA_CHEMOTAXIS_DN	0	1
Lamb2	10588942	MILI_PSEUDOPODIA_CHEMOTAXIS_DN	0	0
Lamb3	10352838	HUANG_DASATINIB_RESISTANCE_UP	0	0
Lamc1	10358816	MILI_PSEUDOPODIA_CHEMOTAXIS_DN	0	0
Lamtor2	10499420	PID_CERAMIDE_PATHWAY	0	1
Larp6	10586011	HUANG_DASATINIB_RESISTANCE_UP	0	0
Layn	10593449	HUANG_DASATINIB_RESISTANCE_UP	0	0
Lcn2	10481627	LANDIS_BREAST_CANCER_PROGRESSION_UP	0	0
Ldlr	10583732	MILI_PSEUDOPODIA_CHEMOTAXIS_DN	0	0
Leprel2			0	1
Letmd1	10426909	MILI_PSEUDOPODIA_CHEMOTAXIS_DN	0	0
Lgmn	10402268	MILI_PSEUDOPODIA_CHEMOTAXIS_DN	0	0
Lhfpl2	10406676	MILI_PSEUDOPODIA_CHEMOTAXIS_DN	0	0
Lig1	10550102	REACTOME_PROCESSIVE_SYNTHESIS_ON_THE_LAGGING_STRAND, KEGG_BASE_EXCISION_REPAIR	0	0
Lig3	10379564	KEGG_BASE_EXCISION_REPAIR	0	0
Lig4	10576946	KEGG_BASE_EXCISION_REPAIR	0	1
Lima1	10432540	HUANG_DASATINIB_RESISTANCE_UP	0	0
Lime1	10479607	MILI_PSEUDOPODIA_CHEMOTAXIS_DN	0	0
Litaf	10437687	LANDIS_BREAST_CANCER_PROGRESSION_UP	0	0
Lmbrd1	10345141	MILI_PSEUDOPODIA_CHEMOTAXIS_DN	0	0
Lmf1	10442816	MOOTHA_FFA_OXYDATION	0	1
Lmna	10499394	CROMER_METASTASIS_DN	0	0
Lox	10458894	MILI_PSEUDOPODIA_CHEMOTAXIS_DN, GOTZMANN_EPITHELIAL_TO_MESENCHYMAL_TRANSITION_UP	0	1
Lrdd			0	1
Lrp12	10428353	MILI_PSEUDOPODIA_CHEMOTAXIS_DN	0	0
Lrrfip1	10348493	LANDIS_BREAST_CANCER_PROGRESSION_UP	0	0
Lrsam1	10481734	KEGG_BASE_EXCISION_REPAIR	0	1
Lsm6	10579833, 10388745, 10577598	REACTOME_POL_SWITCHING	0	1
Lsr	10562181	LANDIS_BREAST_CANCER_PROGRESSION_UP	0	0
Lss	10364194	NIKOLSKY_BREAST_CANCER_21Q22_AMPLICON	0	0
Ltbp4	10561212	MILI_PSEUDOPODIA_CHEMOTAXIS_DN	0	0
Lum	10365983	GOTZMANN_EPITHELIAL_TO_MESENCHYMAL_TRANSITION_UP	0	1
Ly6a	10429564	HUANG_DASATINIB_RESISTANCE_UP	0	1
Ly75	10482929	GOTZMANN_EPITHELIAL_TO_MESENCHYMAL_TRANSITION_UP	0	0
Lyn	10503098	HUANG_DASATINIB_RESISTANCE_UP	0	0
Lztfl1	10597973, 10463263	KEGG_SNARE_INTERACTIONS_IN_VESICULAR_TRANSPORT	0	1
Mad2l1	10538832	GOTZMANN_EPITHELIAL_TO_MESENCHYMAL_TRANSITION_UP	0	1
Madd	10484941	PID_CERAMIDE_PATHWAY	0	0
Mall	10487447	CROMER_METASTASIS_DN	0	0
Maml1	10385591	REACTOME_NOTCH_HLH_TRANSCRIPTION_PATHWAY	0	0
Maml2	10583207	REACTOME_NOTCH_HLH_TRANSCRIPTION_PATHWAY, HUANG_DASATINIB_RESISTANCE_UP	0	0
Maml3	10498076	REACTOME_NOTCH_HLH_TRANSCRIPTION_PATHWAY	0	0
Mamld1	10599962	REACTOME_NOTCH_HLH_TRANSCRIPTION_PATHWAY	0	0
Man2b1	10573583	MILI_PSEUDOPODIA_CHEMOTAXIS_DN	0	0
Manf	10596575, 10596570	MILI_PSEUDOPODIA_CHEMOTAXIS_DN	0	1
Map2k1	10594447	REACTOME_SOS_MEDIATED_SIGNALLING, BIOCARTA_CERAMIDE_PATHWAY, PID_CERAMIDE_PATHWAY	0	0
Map2k2	10364971	REACTOME_SOS_MEDIATED_SIGNALLING, PID_CERAMIDE_PATHWAY	0	0
Map2k4	10387014	BIOCARTA_CERAMIDE_PATHWAY, PID_CERAMIDE_PATHWAY	0	0
Map3k1	10412100	BIOCARTA_CERAMIDE_PATHWAY, PID_CERAMIDE_PATHWAY	0	0
Map4	10589438, 10589462	GOTZMANN_EPITHELIAL_TO_MESENCHYMAL_TRANSITION_UP	0	0
Map4k4	10345715	PID_CERAMIDE_PATHWAY, MILI_PSEUDOPODIA_CHEMOTAXIS_DN	0	0
Map7d1	10516305	HUANG_DASATINIB_RESISTANCE_UP	0	0
Mapk1	10433940	REACTOME_SOS_MEDIATED_SIGNALLING, BIOCARTA_CERAMIDE_PATHWAY, PID_CERAMIDE_PATHWAY	0	0
Mapk14	10443391	MILI_PSEUDOPODIA_CHEMOTAXIS_DN	0	0
Mapk3	10557459	REACTOME_SOS_MEDIATED_SIGNALLING, BIOCARTA_CERAMIDE_PATHWAY, PID_CERAMIDE_PATHWAY	0	0
Mapk8	10418879	BIOCARTA_CERAMIDE_PATHWAY, PID_CERAMIDE_PATHWAY	0	0
Mapk8ip3	10448765, 10448755	MILI_PSEUDOPODIA_CHEMOTAXIS_DN, PID_CERAMIDE_PATHWAY	0	1
Mast4	10411804	CROMER_METASTASIS_DN, MILI_PSEUDOPODIA_CHEMOTAXIS_DN	0	0
Matn2	10423599	MILI_PSEUDOPODIA_CHEMOTAXIS_DN	0	0
Matn4	10489471	MILI_PSEUDOPODIA_CHEMOTAXIS_DN	0	0
Matr3	10454809, 10454828	MILI_PSEUDOPODIA_CHEMOTAXIS_DN	0	0
Mbd2	10456566	CROMER_METASTASIS_DN	0	0
Mbd4	10547088	KEGG_BASE_EXCISION_REPAIR	0	0
Mcl1	10494306	PID_CERAMIDE_PATHWAY	0	1
Mcm3	10353420	GOTZMANN_EPITHELIAL_TO_MESENCHYMAL_TRANSITION_UP	0	0
Mcm3ap	10364164	NIKOLSKY_BREAST_CANCER_21Q22_AMPLICON	0	0
Mcm4	10437945	GOTZMANN_EPITHELIAL_TO_MESENCHYMAL_TRANSITION_UP	0	1
Mdm2	10372668	INGA_TP53_TARGETS	0	0
Med15	10438198	MILI_PSEUDOPODIA_CHEMOTAXIS_DN	0	0
Met	10536505	HUANG_DASATINIB_RESISTANCE_UP	0	0
Metap2	10371987	REACTOME_POL_SWITCHING	0	1
Metrnl	10383615	MILI_PSEUDOPODIA_CHEMOTAXIS_DN	0	0
Mfsd10	10529410	MILI_PSEUDOPODIA_CHEMOTAXIS_DN	0	0
Mfsd9	10354220	MILI_PSEUDOPODIA_CHEMOTAXIS_DN	0	0
Mink1	10377889	CROMER_METASTASIS_DN	0	0
Mki67	10568714	GOTZMANN_EPITHELIAL_TO_MESENCHYMAL_TRANSITION_UP	0	0
Mmp11	10370037	MILI_PSEUDOPODIA_CHEMOTAXIS_DN	0	0
Moap1	10402294	INGA_TP53_TARGETS	0	1
Mogs	10539337	MILI_PSEUDOPODIA_CHEMOTAXIS_DN	0	0
Mpdz	10514000	GOTZMANN_EPITHELIAL_TO_MESENCHYMAL_TRANSITION_UP	0	0
Mpg	10375038	KEGG_BASE_EXCISION_REPAIR, MILI_PSEUDOPODIA_CHEMOTAXIS_DN	0	0
Mrpl28	10442948	BOGNI_TREATMENT_RELATED_MYELOID_LEUKEMIA_DN	0	0
Mrpl38	10393125	REACTOME_POL_SWITCHING	0	1
Mrps12	10561513	CROMER_METASTASIS_DN	0	0
Msh6	10447417	KEGG_BASE_EXCISION_REPAIR	0	1
Msln	10449000	MILI_PSEUDOPODIA_CHEMOTAXIS_DN	0	0
Mst1	10588855	MILI_PSEUDOPODIA_CHEMOTAXIS_DN	0	0
Mtbp	10424188	INGA_TP53_TARGETS	0	1
Mtch2	10473737, 10530851	MILI_PSEUDOPODIA_CHEMOTAXIS_DN	0	0
Mutyh	10507362	KEGG_BASE_EXCISION_REPAIR	0	0
Mx1	10441233	MOSERLE_IFNA_RESPONSE	0	0
Mx2	10437224	MOSERLE_IFNA_RESPONSE	0	1
Myb	10368199	BOGNI_TREATMENT_RELATED_MYELOID_LEUKEMIA_DN	0	0
Myc	10424400	FLECHNER_BIOPSY_KIDNEY_TRANSPLANT_OK_VS_DONOR_DN, PID_CERAMIDE_PATHWAY	0	0
Myl6b	10373400	MILI_PSEUDOPODIA_CHEMOTAXIS_DN	0	0
Myo9b	10572533	MILI_PSEUDOPODIA_CHEMOTAXIS_DN	0	0
Naa40	10465638	MILI_PSEUDOPODIA_CHEMOTAXIS_DN	0	0
Naga	10430834	MILI_PSEUDOPODIA_CHEMOTAXIS_DN	0	0
Nagk	10539472	MILI_PSEUDOPODIA_CHEMOTAXIS_DN	0	0
Naglu	10381211	MILI_PSEUDOPODIA_CHEMOTAXIS_DN	0	0
Napa	10550237	KEGG_SNARE_INTERACTIONS_IN_VESICULAR_TRANSPORT	0	1
Nbn	10503431	MOOTHA_FFA_OXYDATION	0	0
Ncam1	10593293, 10593316	GOTZMANN_EPITHELIAL_TO_MESENCHYMAL_TRANSITION_UP	0	0
Ncaph2	10426225	MOOTHA_FFA_OXYDATION, MILI_PSEUDOPODIA_CHEMOTAXIS_DN	0	0
Nceh1	10491083	MILI_PSEUDOPODIA_CHEMOTAXIS_DN	0	0
Nck1	10596043	CROMER_METASTASIS_DN	0	0
Ncor2	10533875	REACTOME_NOTCH_HLH_TRANSCRIPTION_PATHWAY	0	1
Ndc80	10452709	HUANG_DASATINIB_RESISTANCE_UP	0	0
Ndel1	10387180	MILI_PSEUDOPODIA_CHEMOTAXIS_DN	0	0
Ndfip2	10416899	MILI_PSEUDOPODIA_CHEMOTAXIS_DN	0	0
Nedd4l	10456254	MILI_PSEUDOPODIA_CHEMOTAXIS_DN	0	0
Neil1	10593887	KEGG_BASE_EXCISION_REPAIR	0	0
Neil2	10420736	KEGG_BASE_EXCISION_REPAIR	0	0
Neil3	10578690	KEGG_BASE_EXCISION_REPAIR	0	0
Neu1	10444578	MILI_PSEUDOPODIA_CHEMOTAXIS_DN	0	0
Nf2	10383897	FLECHNER_BIOPSY_KIDNEY_TRANSPLANT_OK_VS_DONOR_DN	0	0
Nfib	10514054, 10514049	MILI_PSEUDOPODIA_CHEMOTAXIS_DN	0	0
Nfkb1	10502299	BIOCARTA_CERAMIDE_PATHWAY, PID_CERAMIDE_PATHWAY	0	0
Nfkbia	10400405	PID_CERAMIDE_PATHWAY	0	0
Nfkbiz	10439936	MILI_PSEUDOPODIA_CHEMOTAXIS_DN	0	0
Nhlrc3	10498146	MILI_PSEUDOPODIA_CHEMOTAXIS_DN	0	0
Nid1	10403584	GOTZMANN_EPITHELIAL_TO_MESENCHYMAL_TRANSITION_UP, MILI_PSEUDOPODIA_CHEMOTAXIS_DN	0	1
Nktr	10590389	BOGNI_TREATMENT_RELATED_MYELOID_LEUKEMIA_DN	0	0
Nlk	10388884	BOGNI_TREATMENT_RELATED_MYELOID_LEUKEMIA_DN	0	1
Nnmt	10593219	HUANG_DASATINIB_RESISTANCE_UP	0	0
Noc2l	10608699	MILI_PSEUDOPODIA_CHEMOTAXIS_DN	0	0
Nop16	10409338	CROMER_METASTASIS_DN	0	0
Nop2	10541845	CROMER_METASTASIS_DN	0	0
Notch1	10481056	REACTOME_NOTCH_HLH_TRANSCRIPTION_PATHWAY	0	1
Notch3	10449775	REACTOME_NOTCH_HLH_TRANSCRIPTION_PATHWAY	0	0
Notch4	10444352, 10444386	REACTOME_NOTCH_HLH_TRANSCRIPTION_PATHWAY	0	0
Npc1	10457508	MILI_PSEUDOPODIA_CHEMOTAXIS_DN	0	0
Npr2	10504375	MILI_PSEUDOPODIA_CHEMOTAXIS_DN	0	0
Nr2c1	10365870	BOGNI_TREATMENT_RELATED_MYELOID_LEUKEMIA_DN	0	0
Nras	10494857	REACTOME_SOS_MEDIATED_SIGNALLING	0	0
Nrip1	10440406	BOGNI_TREATMENT_RELATED_MYELOID_LEUKEMIA_DN	0	1
Nrp1	10576639	MILI_PSEUDOPODIA_CHEMOTAXIS_DN	0	0
Nrp2	10346843	MILI_PSEUDOPODIA_CHEMOTAXIS_DN	0	0
Nsmaf	10511382	BIOCARTA_CERAMIDE_PATHWAY, PID_CERAMIDE_PATHWAY	0	0
Nthl1	10442542	KEGG_BASE_EXCISION_REPAIR	0	0
Nucb1	10563323	MILI_PSEUDOPODIA_CHEMOTAXIS_DN	0	1
Nucb2	10556583	LANDIS_BREAST_CANCER_PROGRESSION_UP	0	0
Oas2	10533198	MOSERLE_IFNA_RESPONSE	0	0
Oasl2	10524621	MOSERLE_IFNA_RESPONSE	0	1
Oat	10568568	GOTZMANN_EPITHELIAL_TO_MESENCHYMAL_TRANSITION_UP	0	0
Odc1	10582295, 10394770	GOTZMANN_EPITHELIAL_TO_MESENCHYMAL_TRANSITION_UP	0	0
Ogg1	10540639	KEGG_BASE_EXCISION_REPAIR	0	0
Ogt	10601235	MILI_PSEUDOPODIA_CHEMOTAXIS_DN	0	0
Osbpl9	10515051	MILI_PSEUDOPODIA_CHEMOTAXIS_DN	0	0
Osmr	10427471	HUANG_DASATINIB_RESISTANCE_UP	0	0
P2rx4	10525439	MILI_PSEUDOPODIA_CHEMOTAXIS_DN	0	0
P4ha1	10363350	MILI_PSEUDOPODIA_CHEMOTAXIS_DN	0	0
P4ha2	10376074	MILI_PSEUDOPODIA_CHEMOTAXIS_DN	0	0
Pa2g4	10373454	CROMER_METASTASIS_DN	0	0
Pabpn1	10415119, 10343135, 10338689, 10344352, 10340539, 10339283, 10342100, 10339390, 10343138, 10341358, 10342980, 10344585	MILI_PSEUDOPODIA_CHEMOTAXIS_DN	0	0
Pafah1b1	10388337	GOTZMANN_EPITHELIAL_TO_MESENCHYMAL_TRANSITION_UP	0	0
Pan3	10527575	MILI_PSEUDOPODIA_CHEMOTAXIS_DN	0	0
Parp1	10352242	KEGG_BASE_EXCISION_REPAIR	0	0
Parp14	10439249	MOSERLE_IFNA_RESPONSE	0	1
Parp2	10414497	KEGG_BASE_EXCISION_REPAIR	0	0
Parp3	10596492	KEGG_BASE_EXCISION_REPAIR	0	0
Parp4	10415513	KEGG_BASE_EXCISION_REPAIR	0	0
Parp9	10435457	MOSERLE_IFNA_RESPONSE	0	1
Pawr	10366266	PID_CERAMIDE_PATHWAY	0	0
Paxip1	10528840	FLECHNER_BIOPSY_KIDNEY_TRANSPLANT_OK_VS_DONOR_DN	0	0
Pcbp3	10370242	NIKOLSKY_BREAST_CANCER_21Q22_AMPLICON	0	0
Pcdh1	10458534	MILI_PSEUDOPODIA_CHEMOTAXIS_DN	0	0
Pcdh19	10606600	MILI_PSEUDOPODIA_CHEMOTAXIS_DN	0	0
Pcdh7	10521972	HUANG_DASATINIB_RESISTANCE_UP	0	0
Pcf11	10565547	FLECHNER_BIOPSY_KIDNEY_TRANSPLANT_OK_VS_DONOR_DN	0	0
Pcna	10487930, 10461391	REACTOME_PROCESSIVE_SYNTHESIS_ON_THE_LAGGING_STRAND, INGA_TP53_TARGETS, REACTOME_POL_SWITCHING, KEGG_BASE_EXCISION_REPAIR	0	0
Pcnt	10370127	NIKOLSKY_BREAST_CANCER_21Q22_AMPLICON	0	0
Pcnxl3	10465150	MILI_PSEUDOPODIA_CHEMOTAXIS_DN	0	0
Pde7a	10497399	MILI_PSEUDOPODIA_CHEMOTAXIS_DN	0	0
Pdgfa	10535043	GOTZMANN_EPITHELIAL_TO_MESENCHYMAL_TRANSITION_UP, PID_CERAMIDE_PATHWAY	0	0
Pdgfra	10522503	MILI_PSEUDOPODIA_CHEMOTAXIS_DN	0	0
Pdia3	10475335	MILI_PSEUDOPODIA_CHEMOTAXIS_DN	0	0
Pdia5	10439218	MILI_PSEUDOPODIA_CHEMOTAXIS_DN	0	0
Pdia6	10394735	MILI_PSEUDOPODIA_CHEMOTAXIS_DN	0	0
Pea15a	10360227	BIOCARTA_CERAMIDE_PATHWAY	0	1
Per3	10518781	MILI_PSEUDOPODIA_CHEMOTAXIS_DN	0	0
Pfkl	10370376	MILI_PSEUDOPODIA_CHEMOTAXIS_DN	0	0
Pfkp	10407481	CROMER_METASTASIS_DN	0	0
Pgm1	10522009	HUANG_DASATINIB_RESISTANCE_UP, MILI_PSEUDOPODIA_CHEMOTAXIS_DN	0	0
Phb2	10541711	MILI_PSEUDOPODIA_CHEMOTAXIS_DN	0	0
Phf2	10409076	REACTOME_NOTCH_HLH_TRANSCRIPTION_PATHWAY	0	1
Phlda2	10569437	CROMER_METASTASIS_DN	0	0
Pi16	10443494	MILI_PSEUDOPODIA_CHEMOTAXIS_DN	0	0
Pi4kb	10494137	MILI_PSEUDOPODIA_CHEMOTAXIS_DN	0	0
Pigm	10351788	MILI_PSEUDOPODIA_CHEMOTAXIS_DN	0	0
Pik3ip1	10373740	MILI_PSEUDOPODIA_CHEMOTAXIS_DN	0	0
Pik3r3	10507273	REACTOME_SOS_MEDIATED_SIGNALLING	0	1
Pim2	10598467	BOGNI_TREATMENT_RELATED_MYELOID_LEUKEMIA_DN	0	0
Pim3	10426110	MILI_PSEUDOPODIA_CHEMOTAXIS_DN	0	0
Pkd1	10442495	MILI_PSEUDOPODIA_CHEMOTAXIS_DN	0	0
Pkp1	10358124	GOTZMANN_EPITHELIAL_TO_MESENCHYMAL_TRANSITION_UP, CROMER_METASTASIS_DN	0	0
Pkp3	10558795	CROMER_METASTASIS_DN	0	1
Pla2g4a	10358434	GOTZMANN_EPITHELIAL_TO_MESENCHYMAL_TRANSITION_UP	0	0
Pla2g7	10445293	MILI_PSEUDOPODIA_CHEMOTAXIS_DN	0	0
Plagl2	10488697	MILI_PSEUDOPODIA_CHEMOTAXIS_DN	0	0
Plat	10570855	MILI_PSEUDOPODIA_CHEMOTAXIS_DN	0	0
Plau	10413047	HUANG_DASATINIB_RESISTANCE_UP	0	0
Pld3	10561306	MILI_PSEUDOPODIA_CHEMOTAXIS_DN	0	0
Plec	10429802	CROMER_METASTASIS_DN	0	0
Plekhm2	10517996	MILI_PSEUDOPODIA_CHEMOTAXIS_DN	0	0
Plin5	10451943	MOOTHA_FFA_OXYDATION	0	1
Plk4	10491805	GOTZMANN_EPITHELIAL_TO_MESENCHYMAL_TRANSITION_UP	0	0
Plod1	10518408	MILI_PSEUDOPODIA_CHEMOTAXIS_DN	0	0
Plod3	10526520	MILI_PSEUDOPODIA_CHEMOTAXIS_DN	0	1
Plscr1	10356082, 10587792	FLECHNER_BIOPSY_KIDNEY_TRANSPLANT_OK_VS_DONOR_DN	0	1
Plxna3	10600419	MILI_PSEUDOPODIA_CHEMOTAXIS_DN	0	0
Pmaip1	10456357	INGA_TP53_TARGETS	0	0
Pnpla7	10469867	MILI_PSEUDOPODIA_CHEMOTAXIS_DN	0	0
Pofut1	10477286	MILI_PSEUDOPODIA_CHEMOTAXIS_DN	0	0
Pofut2	10364251	NIKOLSKY_BREAST_CANCER_21Q22_AMPLICON, MILI_PSEUDOPODIA_CHEMOTAXIS_DN	0	0
Pola1	10605674	REACTOME_PROCESSIVE_SYNTHESIS_ON_THE_LAGGING_STRAND, REACTOME_POL_SWITCHING	0	0
Pola2	10465282	REACTOME_PROCESSIVE_SYNTHESIS_ON_THE_LAGGING_STRAND, REACTOME_POL_SWITCHING	0	0
Polb	10577544	KEGG_BASE_EXCISION_REPAIR	0	0
Pold1	10562818	REACTOME_PROCESSIVE_SYNTHESIS_ON_THE_LAGGING_STRAND, REACTOME_POL_SWITCHING, KEGG_BASE_EXCISION_REPAIR	0	0
Pold2	10384032	REACTOME_PROCESSIVE_SYNTHESIS_ON_THE_LAGGING_STRAND, REACTOME_POL_SWITCHING, KEGG_BASE_EXCISION_REPAIR	0	0
Pold3	10565862	REACTOME_PROCESSIVE_SYNTHESIS_ON_THE_LAGGING_STRAND, REACTOME_POL_SWITCHING, KEGG_BASE_EXCISION_REPAIR	0	0
Pold4	10460392	REACTOME_PROCESSIVE_SYNTHESIS_ON_THE_LAGGING_STRAND, REACTOME_POL_SWITCHING, KEGG_BASE_EXCISION_REPAIR	0	0
Poldip2	10379204	BOGNI_TREATMENT_RELATED_MYELOID_LEUKEMIA_DN	0	1
Poldip3	10430945	MILI_PSEUDOPODIA_CHEMOTAXIS_DN, REACTOME_POL_SWITCHING	0	1
Pole	10524169	KEGG_BASE_EXCISION_REPAIR	0	0
Pole2	10400649	KEGG_BASE_EXCISION_REPAIR	0	0
Pole3	10513622	KEGG_BASE_EXCISION_REPAIR	0	0
Pole4	10545583	KEGG_BASE_EXCISION_REPAIR	0	0
Polg	10564736	MILI_PSEUDOPODIA_CHEMOTAXIS_DN	0	0
Poll	10468049	KEGG_BASE_EXCISION_REPAIR	0	0
Polm	10384020	KEGG_BASE_EXCISION_REPAIR	0	1
Popdc3	10362959	HUANG_DASATINIB_RESISTANCE_UP	0	0
Por	10526363	MILI_PSEUDOPODIA_CHEMOTAXIS_DN	0	0
Ppic	10458906	GOTZMANN_EPITHELIAL_TO_MESENCHYMAL_TRANSITION_UP	0	0
Ppil2	10438071	MILI_PSEUDOPODIA_CHEMOTAXIS_DN	0	0
Ppp1r18	10444932	HUANG_DASATINIB_RESISTANCE_UP	0	0
Ppp2r5a	10510197, 10510162, 10361104, 10518341	BOGNI_TREATMENT_RELATED_MYELOID_LEUKEMIA_DN	0	1
Ppp2r5c	10398461	BOGNI_TREATMENT_RELATED_MYELOID_LEUKEMIA_DN	0	1
Ppp4c	10568040	CROMER_METASTASIS_DN	0	0
Ppp6r3	10464479	MILI_PSEUDOPODIA_CHEMOTAXIS_DN	0	0
Ppt1	10507784	MILI_PSEUDOPODIA_CHEMOTAXIS_DN	0	0
Ppt2	10450226	BOGNI_TREATMENT_RELATED_MYELOID_LEUKEMIA_DN	0	0
Pqlc1	10457007	LANDIS_BREAST_CANCER_PROGRESSION_UP	0	0
Prim1	10367076	REACTOME_PROCESSIVE_SYNTHESIS_ON_THE_LAGGING_STRAND, REACTOME_POL_SWITCHING	0	0
Prim2	10353733	REACTOME_PROCESSIVE_SYNTHESIS_ON_THE_LAGGING_STRAND, REACTOME_POL_SWITCHING	0	0
Prkcd	10418410	PID_CERAMIDE_PATHWAY	0	0
Prkcsh	10583788	MILI_PSEUDOPODIA_CHEMOTAXIS_DN	0	1
Prkcz	10519117, 10561335	PID_CERAMIDE_PATHWAY	0	0
Prkra	10483856	PID_CERAMIDE_PATHWAY	0	0
Prnp	10476314	HUANG_DASATINIB_RESISTANCE_UP, MILI_PSEUDOPODIA_CHEMOTAXIS_DN	0	0
Prodh	10438272	CROMER_METASTASIS_DN	0	0
Pros1	10436456	GOTZMANN_EPITHELIAL_TO_MESENCHYMAL_TRANSITION_UP	0	0
Prpf38a	10515012	REACTOME_POL_SWITCHING	0	1
Prss3	10544338, 10544342, 10537650	CROMER_METASTASIS_DN	0	0
Psmb8	10444258	HUANG_DASATINIB_RESISTANCE_UP	0	0
Psmb9	10450145	HUANG_DASATINIB_RESISTANCE_UP	0	0
Psmd1	10348004	MILI_PSEUDOPODIA_CHEMOTAXIS_DN	0	0
Psmd8	10561679	CROMER_METASTASIS_DN	0	0
Ptgr2	10397189	MOOTHA_FFA_OXYDATION	0	1
Ptgs1	10471721	MILI_PSEUDOPODIA_CHEMOTAXIS_DN	0	0
Ptpra	10476163	MILI_PSEUDOPODIA_CHEMOTAXIS_DN	0	0
Ptprf	10515613	MILI_PSEUDOPODIA_CHEMOTAXIS_DN	0	0
Ptprm	10452571	BOGNI_TREATMENT_RELATED_MYELOID_LEUKEMIA_DN	0	1
Ptprr	10366457	REACTOME_SOS_MEDIATED_SIGNALLING	0	1
Ptrf	10391332	HUANG_DASATINIB_RESISTANCE_UP	0	0
Puf60	10429739	MILI_PSEUDOPODIA_CHEMOTAXIS_DN	0	0
Pvr	10560709	MILI_PSEUDOPODIA_CHEMOTAXIS_DN	0	0
Qsox1	10359034	MILI_PSEUDOPODIA_CHEMOTAXIS_DN	0	0
Rab31	10452485	CROMER_METASTASIS_DN	0	0
Rab5b	10606261, 10486057, 10496032, 10368504, 10353991, 10373519, 10373521	MILI_PSEUDOPODIA_CHEMOTAXIS_DN	0	0
Rabgap1	10471784	NIKOLSKY_BREAST_CANCER_21Q22_AMPLICON	0	1
Rac2	10430372	HUANG_DASATINIB_RESISTANCE_UP	0	0
Raf1	10547034	REACTOME_SOS_MEDIATED_SIGNALLING, BIOCARTA_CERAMIDE_PATHWAY, PID_CERAMIDE_PATHWAY	0	0
Rai14	10427744	HUANG_DASATINIB_RESISTANCE_UP	0	0
Rala	10407907	BOGNI_TREATMENT_RELATED_MYELOID_LEUKEMIA_DN	0	1
Ranbp3	10446149	MILI_PSEUDOPODIA_CHEMOTAXIS_DN	0	0
Rara	10381082	MILI_PSEUDOPODIA_CHEMOTAXIS_DN, BOGNI_TREATMENT_RELATED_MYELOID_LEUKEMIA_DN	0	1
Rassf5	10357594	REACTOME_SOS_MEDIATED_SIGNALLING	0	1
Rb1	10421526	PID_CERAMIDE_PATHWAY	0	0
Rbbp6	10557211, 10557213, 10557206	GOTZMANN_EPITHELIAL_TO_MESENCHYMAL_TRANSITION_UP	0	0
Rbl1	10489127	GOTZMANN_EPITHELIAL_TO_MESENCHYMAL_TRANSITION_UP	0	0
Rbm10	10598872	NIKOLSKY_BREAST_CANCER_21Q22_AMPLICON	0	1
Rbm39	10489018	MILI_PSEUDOPODIA_CHEMOTAXIS_DN	0	0
Rbms1	10483023, 10483025	FLECHNER_BIOPSY_KIDNEY_TRANSPLANT_OK_VS_DONOR_DN	0	0
Rbpj	10521913, 10521911	REACTOME_NOTCH_HLH_TRANSCRIPTION_PATHWAY	0	0
Rbx1	10425522, 10450646	MILI_PSEUDOPODIA_CHEMOTAXIS_DN	0	0
Rcn3	10563077	MILI_PSEUDOPODIA_CHEMOTAXIS_DN	0	0
Rel	10384725	REACTOME_POL_SWITCHING	0	1
Rev3l	10362633	KEGG_BASE_EXCISION_REPAIR	0	1
Rexo2	10593205	HUANG_DASATINIB_RESISTANCE_UP	0	0
Rfc2	10526217	REACTOME_POL_SWITCHING	0	0
Rfc3	10535979	REACTOME_POL_SWITCHING	0	0
Rfc4	10438690	REACTOME_POL_SWITCHING	0	0
Rfc5	10533090	REACTOME_POL_SWITCHING	0	0
Rgl2	10444079	BOGNI_TREATMENT_RELATED_MYELOID_LEUKEMIA_DN	0	0
Rgmb	10448081	MILI_PSEUDOPODIA_CHEMOTAXIS_DN	0	0
Rgs3	10505326, 10607113	MILI_PSEUDOPODIA_CHEMOTAXIS_DN	0	0
Rhbdf1	10384985	FLECHNER_BIOPSY_KIDNEY_TRANSPLANT_OK_VS_DONOR_DN	0	0
Rhpn2	10552156	LANDIS_BREAST_CANCER_PROGRESSION_UP	0	1
Rictor	10422781	MILI_PSEUDOPODIA_CHEMOTAXIS_DN	0	0
Riok1	10404630	MILI_PSEUDOPODIA_CHEMOTAXIS_DN	0	0
Ripk1	10404506	BIOCARTA_CERAMIDE_PATHWAY, PID_CERAMIDE_PATHWAY	0	0
Ripk4	10441270	HUANG_DASATINIB_RESISTANCE_UP	0	0
Rmi1	10608422, 10405628	REACTOME_PROCESSIVE_SYNTHESIS_ON_THE_LAGGING_STRAND	0	1
Rnf10	10532965	MILI_PSEUDOPODIA_CHEMOTAXIS_DN	0	0
Rnf149	10354191	LANDIS_BREAST_CANCER_PROGRESSION_UP	0	0
Rnf166	10582330	MILI_PSEUDOPODIA_CHEMOTAXIS_DN	0	0
Rnps1	10442435, 10543080	MILI_PSEUDOPODIA_CHEMOTAXIS_DN, NIKOLSKY_BREAST_CANCER_21Q22_AMPLICON	0	1
Rpa1	10388409	REACTOME_PROCESSIVE_SYNTHESIS_ON_THE_LAGGING_STRAND	0	0
Rpa2	10508759	REACTOME_PROCESSIVE_SYNTHESIS_ON_THE_LAGGING_STRAND	0	0
Rpa3	10543114	REACTOME_PROCESSIVE_SYNTHESIS_ON_THE_LAGGING_STRAND	0	0
Rpap1	10486292	MILI_PSEUDOPODIA_CHEMOTAXIS_DN	0	0
Rpf2	10368730	MILI_PSEUDOPODIA_CHEMOTAXIS_DN	0	0
Rpl11	10528544, 10517457, 10594142, 10454097, 10502745, 10451301	INGA_TP53_TARGETS	0	1
Rpl12	10606261, 10496032, 10368504, 10353991, 10373519, 10389162, 10415640, 10471550	MILI_PSEUDOPODIA_CHEMOTAXIS_DN	0	0
Rpl30	10397699, 10606538, 10499198, 10385570, 10606255, 10433562, 10537349, 10600027, 10443193, 10428074	MILI_PSEUDOPODIA_CHEMOTAXIS_DN	0	0
Rpn1	10539861	MILI_PSEUDOPODIA_CHEMOTAXIS_DN	0	0
Rpn2	10477946	MILI_PSEUDOPODIA_CHEMOTAXIS_DN	0	0
Rps10	10438564, 10494296, 10449370	MILI_PSEUDOPODIA_CHEMOTAXIS_DN	0	0
Rps24	10413174, 10435980, 10446615	MILI_PSEUDOPODIA_CHEMOTAXIS_DN	0	0
Rps9	10549588	FLECHNER_BIOPSY_KIDNEY_TRANSPLANT_OK_VS_DONOR_DN	0	1
Rpsa	10385034, 10502787, 10590253, 10437934, 10373569	GOTZMANN_EPITHELIAL_TO_MESENCHYMAL_TRANSITION_UP	0	0
Rqcd1	10347386	REACTOME_POL_SWITCHING	0	1
Rrbp1	10488195	MILI_PSEUDOPODIA_CHEMOTAXIS_DN	0	0
Rsad2	10399710	MOSERLE_IFNA_RESPONSE	0	0
Rtn4	10374908	MILI_PSEUDOPODIA_CHEMOTAXIS_DN	0	0
Rusc2	10504294	MILI_PSEUDOPODIA_CHEMOTAXIS_DN	0	0
Rxrb	10444137	BOGNI_TREATMENT_RELATED_MYELOID_LEUKEMIA_DN	0	0
S100a6	10493820	GOTZMANN_EPITHELIAL_TO_MESENCHYMAL_TRANSITION_UP	0	0
Samd9l	10542911	MOSERLE_IFNA_RESPONSE, HUANG_DASATINIB_RESISTANCE_UP	0	0
Sbno2	10370721	MILI_PSEUDOPODIA_CHEMOTAXIS_DN	0	0
Scamp2	10585721	MILI_PSEUDOPODIA_CHEMOTAXIS_DN	0	0
Scfd1	10395628	MILI_PSEUDOPODIA_CHEMOTAXIS_DN	0	0
Schip1	10492522, 10492516	INGA_TP53_TARGETS	0	1
Scpep1	10389719	MILI_PSEUDOPODIA_CHEMOTAXIS_DN	0	0
Sec22b	10494583, 10343811	KEGG_SNARE_INTERACTIONS_IN_VESICULAR_TRANSPORT	0	0
Sec24a	10385719	BOGNI_TREATMENT_RELATED_MYELOID_LEUKEMIA_DN	0	0
Sec61a2	10479887	MILI_PSEUDOPODIA_CHEMOTAXIS_DN	0	0
Sec62	10491261	BOGNI_TREATMENT_RELATED_MYELOID_LEUKEMIA_DN	0	0
Sel1l	10401900	MILI_PSEUDOPODIA_CHEMOTAXIS_DN	0	0
Sema3b	10596680	MILI_PSEUDOPODIA_CHEMOTAXIS_DN	0	0
Sema3f	10596747	MILI_PSEUDOPODIA_CHEMOTAXIS_DN	0	0
Sema4c	10353899	MILI_PSEUDOPODIA_CHEMOTAXIS_DN	0	0
Serinc3	10489377	MILI_PSEUDOPODIA_CHEMOTAXIS_DN, LANDIS_BREAST_CANCER_PROGRESSION_UP	0	1
Serp1	10498319	LANDIS_BREAST_CANCER_PROGRESSION_UP	0	0
Serpinb5	10349108	CROMER_METASTASIS_DN	0	0
Serpine1	10534667	GOTZMANN_EPITHELIAL_TO_MESENCHYMAL_TRANSITION_UP, MILI_PSEUDOPODIA_CHEMOTAXIS_DN	0	0
Serpinf1	10388430	MILI_PSEUDOPODIA_CHEMOTAXIS_DN	0	0
Serpinh1	10565794	MILI_PSEUDOPODIA_CHEMOTAXIS_DN	0	1
Sesn1	10362811	INGA_TP53_TARGETS	0	0
Sf3b3	10581674	MILI_PSEUDOPODIA_CHEMOTAXIS_DN	0	0
Sfi1	10383632	MILI_PSEUDOPODIA_CHEMOTAXIS_DN	0	0
Sfn	10517067, 10572635	INGA_TP53_TARGETS, CROMER_METASTASIS_DN	0	0
Sfpq	10508217	MILI_PSEUDOPODIA_CHEMOTAXIS_DN	0	0
Sfswap	10526014	MILI_PSEUDOPODIA_CHEMOTAXIS_DN	0	0
Sgms1	10467068	MILI_PSEUDOPODIA_CHEMOTAXIS_DN	0	0
Sh3bgrl2	10587503	LANDIS_BREAST_CANCER_PROGRESSION_UP	0	1
Sh3gl1	10451907	CROMER_METASTASIS_DN	0	0
Sh3kbp1	10602840	HUANG_DASATINIB_RESISTANCE_UP	0	0
Shoc2	10464015	REACTOME_SOS_MEDIATED_SIGNALLING	0	1
Shq1	10546710	MILI_PSEUDOPODIA_CHEMOTAXIS_DN	0	0
Shroom3	10523260	LANDIS_BREAST_CANCER_PROGRESSION_UP	0	0
Slc10a3	10605324	MILI_PSEUDOPODIA_CHEMOTAXIS_DN	0	0
Slc11a2	10432573	MILI_PSEUDOPODIA_CHEMOTAXIS_DN	0	0
Slc12a4	10581395	MILI_PSEUDOPODIA_CHEMOTAXIS_DN	0	0
Slc12a9	10534728	MILI_PSEUDOPODIA_CHEMOTAXIS_DN	0	0
Slc16a1	10495035	MILI_PSEUDOPODIA_CHEMOTAXIS_DN	0	0
Slc17a9	10479463	FLECHNER_BIOPSY_KIDNEY_TRANSPLANT_OK_VS_DONOR_DN	0	1
Slc19a1	10364239	NIKOLSKY_BREAST_CANCER_21Q22_AMPLICON, MILI_PSEUDOPODIA_CHEMOTAXIS_DN	0	0
Slc19a2	10351259	MILI_PSEUDOPODIA_CHEMOTAXIS_DN	0	0
Slc1a4	10384539	MILI_PSEUDOPODIA_CHEMOTAXIS_DN	0	0
Slc20a1	10475990	MILI_PSEUDOPODIA_CHEMOTAXIS_DN	0	0
Slc20a2	10570837	CROMER_METASTASIS_DN, MILI_PSEUDOPODIA_CHEMOTAXIS_DN	0	0
Slc23a2	10487906	MILI_PSEUDOPODIA_CHEMOTAXIS_DN	0	0
Slc25a20	10589076	MOOTHA_FFA_OXYDATION	0	1
Slc2a10	10478692	MILI_PSEUDOPODIA_CHEMOTAXIS_DN	0	0
Slc30a6	10446804	MILI_PSEUDOPODIA_CHEMOTAXIS_DN	0	0
Slc35a2	10598474	MILI_PSEUDOPODIA_CHEMOTAXIS_DN	0	0
Slc38a10	10393728	MILI_PSEUDOPODIA_CHEMOTAXIS_DN	0	0
Slc38a4	10431915	MILI_PSEUDOPODIA_CHEMOTAXIS_DN	0	0
Slc39a7	10450116	MILI_PSEUDOPODIA_CHEMOTAXIS_DN	0	0
Slc4a7	10412773	MILI_PSEUDOPODIA_CHEMOTAXIS_DN	0	0
Slc6a6	10540122	MILI_PSEUDOPODIA_CHEMOTAXIS_DN	0	0
Slc7a6	10574985	MILI_PSEUDOPODIA_CHEMOTAXIS_DN	0	0
Slfn8	10389143	MOSERLE_IFNA_RESPONSE	0	1
Smad1	10579860	GOTZMANN_EPITHELIAL_TO_MESENCHYMAL_TRANSITION_UP	0	0
Smarcd1	10426798	GOTZMANN_EPITHELIAL_TO_MESENCHYMAL_TRANSITION_UP	0	0
Smc2	10504957	GOTZMANN_EPITHELIAL_TO_MESENCHYMAL_TRANSITION_UP	0	1
Smg5	10493210	MILI_PSEUDOPODIA_CHEMOTAXIS_DN	0	0
Smpd1	10555946	BIOCARTA_CERAMIDE_PATHWAY, PID_CERAMIDE_PATHWAY	0	0
Smpd3	10581479	PID_CERAMIDE_PATHWAY	0	0
Snai1	10478884	GOTZMANN_EPITHELIAL_TO_MESENCHYMAL_TRANSITION_UP	0	0
Snai2	10433776	HUANG_DASATINIB_RESISTANCE_UP	0	0
Snap23	10475199	KEGG_SNARE_INTERACTIONS_IN_VESICULAR_TRANSPORT	0	0
Snap25	10476512	KEGG_SNARE_INTERACTIONS_IN_VESICULAR_TRANSPORT	0	0
Snap29	10433996	KEGG_SNARE_INTERACTIONS_IN_VESICULAR_TRANSPORT	0	0
Snap47	10386388	KEGG_SNARE_INTERACTIONS_IN_VESICULAR_TRANSPORT	0	0
Sned1	10348739	MILI_PSEUDOPODIA_CHEMOTAXIS_DN	0	0
Snhg3	10516908	MILI_PSEUDOPODIA_CHEMOTAXIS_DN	0	0
Snrnp48	10404675	MILI_PSEUDOPODIA_CHEMOTAXIS_DN	0	0
Snrpf	10371981	KEGG_BASE_EXCISION_REPAIR	0	1
Snw1	10401805	REACTOME_NOTCH_HLH_TRANSCRIPTION_PATHWAY	0	0
Snx14	10595573	MILI_PSEUDOPODIA_CHEMOTAXIS_DN	0	0
Snx33	10593878	FLECHNER_BIOPSY_KIDNEY_TRANSPLANT_OK_VS_DONOR_DN	0	1
Snx5	10488237	MILI_PSEUDOPODIA_CHEMOTAXIS_DN	0	0
Snx9	10441436	FLECHNER_BIOPSY_KIDNEY_TRANSPLANT_OK_VS_DONOR_DN	0	1
Socs3	10393449	MILI_PSEUDOPODIA_CHEMOTAXIS_DN	0	0
Socs5	10447356	HUANG_DASATINIB_RESISTANCE_UP	0	0
Sod3	10521824	MILI_PSEUDOPODIA_CHEMOTAXIS_DN	0	0
Son	10436873	MILI_PSEUDOPODIA_CHEMOTAXIS_DN	0	0
Sos1	10453141	REACTOME_SOS_MEDIATED_SIGNALLING	0	0
Sox4	10408450	LANDIS_BREAST_CANCER_PROGRESSION_UP	0	0
Sp100	10347948, 10356262, 10347968	SA_PROGRAMMED_CELL_DEATH	0	1
Sphk2	10563362	PID_CERAMIDE_PATHWAY	0	0
Spint1	10474936	LANDIS_BREAST_CANCER_PROGRESSION_UP	0	0
Spns1	10567838	MILI_PSEUDOPODIA_CHEMOTAXIS_DN	0	0
Sptlc1	10409294	MILI_PSEUDOPODIA_CHEMOTAXIS_DN	0	0
Srebf2	10425695	MILI_PSEUDOPODIA_CHEMOTAXIS_DN	0	0
Sri	10519504	MILI_PSEUDOPODIA_CHEMOTAXIS_DN	0	0
Srp19	10454674	LANDIS_BREAST_CANCER_PROGRESSION_UP	0	0
Srsf6	10478291	BOGNI_TREATMENT_RELATED_MYELOID_LEUKEMIA_DN	0	0
St5	10566767	HUANG_DASATINIB_RESISTANCE_UP	0	0
St6galnac2	10393166	CROMER_METASTASIS_DN	0	0
Stat1	10346191	MOSERLE_IFNA_RESPONSE	0	0
Stat2	10367224	MOSERLE_IFNA_RESPONSE	0	1
Steap3	10357249	MILI_PSEUDOPODIA_CHEMOTAXIS_DN	0	0
Stk19	10450265	KEGG_BASE_EXCISION_REPAIR	0	1
Stk40	10508115	REACTOME_POL_SWITCHING	0	1
Strbp	10482181, 10482177	LANDIS_BREAST_CANCER_PROGRESSION_UP	0	0
Stx11	10367919	KEGG_SNARE_INTERACTIONS_IN_VESICULAR_TRANSPORT	0	0
Stx12	10516982	KEGG_SNARE_INTERACTIONS_IN_VESICULAR_TRANSPORT	0	0
Stx16	10479087	KEGG_SNARE_INTERACTIONS_IN_VESICULAR_TRANSPORT	0	0
Stx17	10504849	KEGG_SNARE_INTERACTIONS_IN_VESICULAR_TRANSPORT	0	0
Stx18	10521543	KEGG_SNARE_INTERACTIONS_IN_VESICULAR_TRANSPORT	0	0
Stx19	10436451	KEGG_SNARE_INTERACTIONS_IN_VESICULAR_TRANSPORT	0	0
Stx1a	10526261	KEGG_SNARE_INTERACTIONS_IN_VESICULAR_TRANSPORT	0	0
Stx1b	10568298, 10568296	KEGG_SNARE_INTERACTIONS_IN_VESICULAR_TRANSPORT	0	0
Stx2	10534041	KEGG_SNARE_INTERACTIONS_IN_VESICULAR_TRANSPORT	0	0
Stx3	10466248	KEGG_SNARE_INTERACTIONS_IN_VESICULAR_TRANSPORT	0	0
Stx4a	10557793	KEGG_SNARE_INTERACTIONS_IN_VESICULAR_TRANSPORT	0	1
Stx5a	10461176	KEGG_SNARE_INTERACTIONS_IN_VESICULAR_TRANSPORT	0	1
Stx6	10350766	KEGG_SNARE_INTERACTIONS_IN_VESICULAR_TRANSPORT	0	0
Stx7	10362171	KEGG_SNARE_INTERACTIONS_IN_VESICULAR_TRANSPORT	0	0
Stx8	10377255	KEGG_SNARE_INTERACTIONS_IN_VESICULAR_TRANSPORT	0	0
Stxbp6	10400143	KEGG_SNARE_INTERACTIONS_IN_VESICULAR_TRANSPORT	0	1
Sun1	10526897	MILI_PSEUDOPODIA_CHEMOTAXIS_DN	0	0
Sun2	10430596	MILI_PSEUDOPODIA_CHEMOTAXIS_DN	0	0
Svil	10453636	CROMER_METASTASIS_DN	0	0
Synpo	10459084	BOGNI_TREATMENT_RELATED_MYELOID_LEUKEMIA_DN	0	1
Syvn1	10460706	MILI_PSEUDOPODIA_CHEMOTAXIS_DN	0	0
Tada2a	10389245	REACTOME_NOTCH_HLH_TRANSCRIPTION_PATHWAY	0	1
Taf5l	10582642	REACTOME_NOTCH_HLH_TRANSCRIPTION_PATHWAY	0	1
Tap1	10444244	HUANG_DASATINIB_RESISTANCE_UP	0	1
Tap2	10444268	MILI_PSEUDOPODIA_CHEMOTAXIS_DN	0	0
Tapbp	10444068	MILI_PSEUDOPODIA_CHEMOTAXIS_DN	0	0
Tbc1d5	10451736	BOGNI_TREATMENT_RELATED_MYELOID_LEUKEMIA_DN	0	0
Tdg	10564663, 10365230, 10368883, 10430871	KEGG_BASE_EXCISION_REPAIR	0	0
Tead2	10552874	GOTZMANN_EPITHELIAL_TO_MESENCHYMAL_TRANSITION_UP	0	0
Tfap2c	10478997	LANDIS_BREAST_CANCER_PROGRESSION_UP	0	0
Tfpi	10484389	HUANG_DASATINIB_RESISTANCE_UP	0	0
Tgfb1	10551185	HUANG_DASATINIB_RESISTANCE_UP	0	1
Tgfbi	10405587	HUANG_DASATINIB_RESISTANCE_UP	0	0
Tgfbr1	10504817	HUANG_DASATINIB_RESISTANCE_UP	0	1
Tgfbr2	10597518	HUANG_DASATINIB_RESISTANCE_UP	0	0
Tgif1	10452633	MILI_PSEUDOPODIA_CHEMOTAXIS_DN	0	0
Tgm2	10489204	NIKOLSKY_BREAST_CANCER_21Q22_AMPLICON	0	1
Thbs2	10447951	GOTZMANN_EPITHELIAL_TO_MESENCHYMAL_TRANSITION_UP	0	1
Thbs3	10493449	MILI_PSEUDOPODIA_CHEMOTAXIS_DN	0	0
Thrap3	10516296, 10516303	MILI_PSEUDOPODIA_CHEMOTAXIS_DN	0	0
Ticam1	10452022	CROMER_METASTASIS_DN	0	0
Timeless	10367179	REACTOME_PROCESSIVE_SYNTHESIS_ON_THE_LAGGING_STRAND	0	1
Timp1	10598976	GOTZMANN_EPITHELIAL_TO_MESENCHYMAL_TRANSITION_UP	0	0
Tipin	10586184	REACTOME_PROCESSIVE_SYNTHESIS_ON_THE_LAGGING_STRAND	0	1
Tle1	10513884	KEGG_BASE_EXCISION_REPAIR	0	1
Tlk2	10381872	REACTOME_SOS_MEDIATED_SIGNALLING	0	1
Tln1	10512514	MILI_PSEUDOPODIA_CHEMOTAXIS_DN	0	0
Tlr2	10498992	MILI_PSEUDOPODIA_CHEMOTAXIS_DN	0	0
Tm2d3	10553956	MILI_PSEUDOPODIA_CHEMOTAXIS_DN	0	0
Tm9sf1	10420071	MILI_PSEUDOPODIA_CHEMOTAXIS_DN	0	0
Tm9sf2	10417147	MILI_PSEUDOPODIA_CHEMOTAXIS_DN	0	0
Tm9sf3	10467560	LANDIS_BREAST_CANCER_PROGRESSION_UP	0	1
Tmcc2	10357698	KEGG_SNARE_INTERACTIONS_IN_VESICULAR_TRANSPORT	0	1
Tmem109	10466087	MILI_PSEUDOPODIA_CHEMOTAXIS_DN	0	0
Tmem11	10386624	FLECHNER_BIOPSY_KIDNEY_TRANSPLANT_OK_VS_DONOR_DN	0	0
Tmem183a	10357917	CROMER_METASTASIS_DN	0	0
Tmem186	10437586	MILI_PSEUDOPODIA_CHEMOTAXIS_DN	0	0
Tmem30b	10400984	LANDIS_BREAST_CANCER_PROGRESSION_UP	0	1
Tmem33	10522250	MILI_PSEUDOPODIA_CHEMOTAXIS_DN	0	0
Tmem43	10540105	MILI_PSEUDOPODIA_CHEMOTAXIS_DN	0	0
Tmem57	10517312	MILI_PSEUDOPODIA_CHEMOTAXIS_DN	0	0
Tnc	10513739	GOTZMANN_EPITHELIAL_TO_MESENCHYMAL_TRANSITION_UP	0	0
Tnf	10450501	PID_CERAMIDE_PATHWAY	0	0
Tnfrsf10b	10416230	INGA_TP53_TARGETS, CROMER_METASTASIS_DN, BOGNI_TREATMENT_RELATED_MYELOID_LEUKEMIA_DN	0	0
Tnfrsf1a	10541895	BIOCARTA_CERAMIDE_PATHWAY, PID_CERAMIDE_PATHWAY	0	0
Tnfrsf1b	10518300	PID_CERAMIDE_PATHWAY	0	1
Tnfrsf21	10445241	HUANG_DASATINIB_RESISTANCE_UP	0	0
Tnfsf10	10491091	MOSERLE_IFNA_RESPONSE	0	0
Tnfsf9	10446229	MILI_PSEUDOPODIA_CHEMOTAXIS_DN	0	0
Tnik	10491136	NIKOLSKY_BREAST_CANCER_21Q22_AMPLICON	0	1
Tnnt3	10559221	CROMER_METASTASIS_DN	0	0
Top1	10478196	GOTZMANN_EPITHELIAL_TO_MESENCHYMAL_TRANSITION_UP	0	0
Tor1b	10471072	MILI_PSEUDOPODIA_CHEMOTAXIS_DN	0	0
Tpbg	10587554	CROMER_METASTASIS_DN, MILI_PSEUDOPODIA_CHEMOTAXIS_DN	0	0
Tpd52	10579872, 10497214	LANDIS_BREAST_CANCER_PROGRESSION_UP	0	0
Tpm4	10448202, 10572747	HUANG_DASATINIB_RESISTANCE_UP, MILI_PSEUDOPODIA_CHEMOTAXIS_DN	0	1
Tpp1	10365288, 10566529	MILI_PSEUDOPODIA_CHEMOTAXIS_DN	0	1
Tpp2	10345930	GOTZMANN_EPITHELIAL_TO_MESENCHYMAL_TRANSITION_UP	0	0
Tra2a	10544629, 10544638, 10544640	MILI_PSEUDOPODIA_CHEMOTAXIS_DN	0	0
Tradd	10581181	BIOCARTA_CERAMIDE_PATHWAY, PID_CERAMIDE_PATHWAY	0	0
Traf1	10481949	PID_CERAMIDE_PATHWAY	0	1
Traf2	10480760	BIOCARTA_CERAMIDE_PATHWAY, PID_CERAMIDE_PATHWAY	0	0
Traf3	10398618	GOTZMANN_EPITHELIAL_TO_MESENCHYMAL_TRANSITION_UP	0	0
Trim16	10376899	CROMER_METASTASIS_DN	0	0
Trim25	10380260	MOSERLE_IFNA_RESPONSE	0	1
Trim29	10584604	CROMER_METASTASIS_DN	0	0
Trim35	10416082	MILI_PSEUDOPODIA_CHEMOTAXIS_DN	0	0
Trim41	10385486	MILI_PSEUDOPODIA_CHEMOTAXIS_DN	0	0
Trmt6	10487969	MILI_PSEUDOPODIA_CHEMOTAXIS_DN	0	0
Trpc4ap	10488892	PID_CERAMIDE_PATHWAY	0	1
Ttc19	10376839	MILI_PSEUDOPODIA_CHEMOTAXIS_DN	0	0
Ttll12	10431035	CROMER_METASTASIS_DN	0	0
Tuba4a	10355806	CROMER_METASTASIS_DN	0	0
Tubgcp4	10475293	MILI_PSEUDOPODIA_CHEMOTAXIS_DN	0	0
Twsg1	10452508	MILI_PSEUDOPODIA_CHEMOTAXIS_DN	0	0
Txndc5	10408741	MILI_PSEUDOPODIA_CHEMOTAXIS_DN	0	0
Txnip	10494428	MILI_PSEUDOPODIA_CHEMOTAXIS_DN	0	0
Tyw1	10526153	MILI_PSEUDOPODIA_CHEMOTAXIS_DN	0	0
Uaca	10586017	KEGG_SNARE_INTERACTIONS_IN_VESICULAR_TRANSPORT	0	1
Ube2b	10385761	MILI_PSEUDOPODIA_CHEMOTAXIS_DN	0	0
Ube2e3	10473118	HUANG_DASATINIB_RESISTANCE_UP	0	0
Ube2i	10598636, 10478012, 10448912	MILI_PSEUDOPODIA_CHEMOTAXIS_DN	0	0
Ube2m	10560070	CROMER_METASTASIS_DN	0	0
Ube3c	10520419	CROMER_METASTASIS_DN	0	0
Ung	10524450	KEGG_BASE_EXCISION_REPAIR	0	0
Upp1	10374236	HUANG_DASATINIB_RESISTANCE_UP	0	0
Use1	10572580	KEGG_SNARE_INTERACTIONS_IN_VESICULAR_TRANSPORT	0	0
Uso1	10523206	REACTOME_POL_SWITCHING	0	1
Usp14	10457409	MILI_PSEUDOPODIA_CHEMOTAXIS_DN	0	0
Usp18	10541307	MOSERLE_IFNA_RESPONSE	0	0
Usp53	10501879	MILI_PSEUDOPODIA_CHEMOTAXIS_DN	0	0
Usp7	10437594	MILI_PSEUDOPODIA_CHEMOTAXIS_DN	0	0
Usp9x	10598678	FLECHNER_BIOPSY_KIDNEY_TRANSPLANT_OK_VS_DONOR_DN	0	0
Vamp1	10541877	KEGG_SNARE_INTERACTIONS_IN_VESICULAR_TRANSPORT	0	0
Vamp2	10377431	KEGG_SNARE_INTERACTIONS_IN_VESICULAR_TRANSPORT	0	0
Vamp3	10518805	KEGG_SNARE_INTERACTIONS_IN_VESICULAR_TRANSPORT	0	0
Vamp4	10351119	KEGG_SNARE_INTERACTIONS_IN_VESICULAR_TRANSPORT	0	0
Vamp5	10545401	KEGG_SNARE_INTERACTIONS_IN_VESICULAR_TRANSPORT	0	0
Vamp7	10607952	KEGG_SNARE_INTERACTIONS_IN_VESICULAR_TRANSPORT	0	0
Vasn	10433274	MILI_PSEUDOPODIA_CHEMOTAXIS_DN	0	0
Vcl	10413059	MILI_PSEUDOPODIA_CHEMOTAXIS_DN	0	0
Vps16	10476136	KEGG_SNARE_INTERACTIONS_IN_VESICULAR_TRANSPORT	0	1
Vps52	10444114	BOGNI_TREATMENT_RELATED_MYELOID_LEUKEMIA_DN	0	0
Vps53	10388492	KEGG_SNARE_INTERACTIONS_IN_VESICULAR_TRANSPORT	0	1
Vsnl1	10399407	CROMER_METASTASIS_DN	0	0
Vti1a	10464070	KEGG_SNARE_INTERACTIONS_IN_VESICULAR_TRANSPORT	0	0
Vti1b	10401172	BOGNI_TREATMENT_RELATED_MYELOID_LEUKEMIA_DN, KEGG_SNARE_INTERACTIONS_IN_VESICULAR_TRANSPORT	0	0
Wdhd1	10419296	REACTOME_POL_SWITCHING	0	1
Wdr26	10360720	MILI_PSEUDOPODIA_CHEMOTAXIS_DN	0	0
Wdr77	10495111	BOGNI_TREATMENT_RELATED_MYELOID_LEUKEMIA_DN	0	1
Wwc1	10385175	LANDIS_BREAST_CANCER_PROGRESSION_UP	0	0
Wwp2	10575184	MILI_PSEUDOPODIA_CHEMOTAXIS_DN	0	0
Xaf1	10378068	MOSERLE_IFNA_RESPONSE	0	1
Xbp1	10374035	LANDIS_BREAST_CANCER_PROGRESSION_UP	0	0
Xrcc1	10550935	KEGG_BASE_EXCISION_REPAIR	0	0
Xrcc6	10425632	FLECHNER_BIOPSY_KIDNEY_TRANSPLANT_OK_VS_DONOR_DN	0	0
Ybey	10370174	NIKOLSKY_BREAST_CANCER_21Q22_AMPLICON	0	0
Ykt6	10374106	KEGG_SNARE_INTERACTIONS_IN_VESICULAR_TRANSPORT	0	0
Ywhab	10478424	REACTOME_SOS_MEDIATED_SIGNALLING	0	0
Ywhaq	10399629	BIOCARTA_CERAMIDE_PATHWAY	0	1
Zbp1	10490150	MOSERLE_IFNA_RESPONSE	0	1
Zc3h4	10550296	MILI_PSEUDOPODIA_CHEMOTAXIS_DN	0	0
Zc3hav1	10544089	MOSERLE_IFNA_RESPONSE	0	0
Zdhhc5	10484440	MILI_PSEUDOPODIA_CHEMOTAXIS_DN	0	0
Zfp36	10561453	MILI_PSEUDOPODIA_CHEMOTAXIS_DN	0	0
Zfx	10605729	GOTZMANN_EPITHELIAL_TO_MESENCHYMAL_TRANSITION_UP	0	0
Zfyve26	10401192	BOGNI_TREATMENT_RELATED_MYELOID_LEUKEMIA_DN	0	0
Zfyve27	10463229	MILI_PSEUDOPODIA_CHEMOTAXIS_DN	0	0
Zkscan1	10526726	MILI_PSEUDOPODIA_CHEMOTAXIS_DN	0	0
Zmynd8	10489723	MILI_PSEUDOPODIA_CHEMOTAXIS_DN	0	0
Zzef1	10378154	MILI_PSEUDOPODIA_CHEMOTAXIS_DN	0	0
